1           **The secreted acid phosphatase domain-containing GRA44 from**  
2           ***Toxoplasma gondii* is required for C-myc induction in infected cells**

3                           William J Blakely, Michael J Holmes and Gustavo Arrizabalaga\*

4   Department of Pharmacology and Toxicology and Department of Biochemistry and Molecular  
5   Biology, *Indiana University School of Medicine, Indianapolis, IN, USA*

6   Running Head: *Toxoplasma* GRA44 is required for C-myc induction in infected cells

7   #Corresponding Author, garrizab@iu.edu

8

## 9 **ABSTRACT**

10 During host cell invasion, the eukaryotic pathogen *Toxoplasma gondii* forms a  
11 parasitophorous vacuole to safely reside within, while partitioned from host cell defense  
12 mechanisms. From within this safe niche parasites sabotage multiple host cell systems  
13 including gene expression, apoptosis and intracellular immune recognition by secreting a large  
14 arsenal of effector proteins. Many parasite proteins studied for active host cell manipulative  
15 interactions have been kinases. Translocation of effectors from the parasitophorous vacuole  
16 into the host cell is mediated by a putative translocon complex, which includes proteins MYR1,  
17 MYR2, and MYR3. Whether other proteins are involved in the structure or regulation of this  
18 putative translocon is not known. We have discovered that the secreted protein GRA44, which  
19 contains a putative acid phosphatase domain, interacts with members of this complex and is  
20 required for host cell effects downstream of effector secretion. We have determined GRA44 is  
21 processed in a region with homology to sequences targeted by protozoan proteases of the  
22 secretory pathway and that both major cleavage fragments are secreted into the  
23 parasitophorous vacuole. Immunoprecipitation experiments showed that GRA44 interacts with  
24 a large number of secreted proteins included MYR1. Importantly, conditional knockdown of  
25 GRA44 resulted in a lack of host cell cMyc upregulation, which mimics the phenotype seen  
26 when members of the translocon complex are genetically disrupted. Thus, the putative acid  
27 phosphatase GRA44 is crucial for host cell alterations during *Toxoplasma* infection and is  
28 associated with the translocon complex which *Toxoplasma* relies upon for success as an  
29 intracellular pathogen.

## 30 **IMPORTANCE**

31        Approximately one third of humans are infected with the parasite *Toxoplasma gondii*.  
32        *Toxoplasma* infections can lead to severe disease in those with a compromised or suppressed  
33        immune system. Additionally, infections during pregnancy present a significant health risk to  
34        the developing fetus. Drugs that target this parasite are limited, have significant side effects,  
35        and do not target all disease stages. Thus, a thorough understanding of how the parasite  
36        propagates within a host is critical in the discovery of novel therapeutic targets. To replicate  
37        *Toxoplasma* requires to enter the cells of the infected organism. In order to survive the  
38        environment inside a cell, *Toxoplasma* secretes a large repertoire of proteins, which hijack a  
39        number of important cellular functions. How these *Toxoplasma* proteins move from the  
40        parasite into the host cell is not well understood. Our work shows that the putative  
41        phosphatase GRA44 is part of a protein complex responsible for this process.

## 42 INTRODUCTION

43 *Toxoplasma gondii* is an obligate intracellular eukaryotic pathogen infecting an estimated  
44 one-third of the human population globally. Approximately 15% of the US population is positive  
45 for *Toxoplasma* infection (1), while some countries in Europe and South America have much  
46 higher infection rates. Within the human host, *Toxoplasma* exists as either highly-proliferative  
47 tachyzoites, which are responsible for the acute stage of the infection, or latent bradyzoite  
48 cysts, which form in various tissues and establish a chronic infection. While most infections are  
49 asymptomatic, in immunocompromised individuals and lymphoma patients, new infections or  
50 re-activation of pre-existing cysts can lead to toxoplasmic encephalitis, among other  
51 complications (2–4). Additionally, a primary infection puts pregnant women at risk of passing  
52 parasites to the developing fetus, which can cause miscarriage and severe birth defects (5).

53 Due to its biological niche as an obligate intracellular parasite, *Toxoplasma* depends upon  
54 remodeling the host cell environment to facilitate its own growth and survival. As the parasite  
55 invades a host cell, it forms an insular vacuole, known as the parasitophorous vacuole (PV),  
56 within which they safely replicate undisturbed by host cell innate immune machinery. Within  
57 the PV, parasites interface with the host cell through the PV membrane while avoiding direct  
58 contact with host cell components. Mediation of interactions between parasites and the host  
59 cell is accomplished by a multitude of parasite proteins that are secreted during invasion from  
60 the rhoptries (ROP proteins) and during intracellular growth from the dense granules (GRA  
61 proteins). Many of these proteins are secreted beyond the PV into the host cell to directly  
62 manipulate host processes like transcription, apoptosis, immune responses and metabolism  
63 (6, 7). Additional proteins are secreted but retained within the PV for the purpose of trafficking  
64 these effectors to the host cytoplasm. The proteins MYR1, MYR2 and MYR3, components of

65 a putative translocon system, are secreted to the PV and are responsible for altering a wide  
66 array of host processes by trafficking effectors to the host (8). Secreted proteins, especially  
67 those with enzymatic activity such as kinases and phosphatases, are of great interest, as they  
68 hold potential as drug targets due to their exclusivity to apicomplexans and importance to  
69 parasite survival. Two kinases secreted during invasion and intracellular growth that are known  
70 to be critical for host manipulation and parasite virulence are ROP16 (9) and ROP18 (10). The  
71 ROP16 kinase acts to downregulate STAT3/6 in the host nucleus, which results in altered  
72 transcription (11). ROP18, in partnership with GRA7, counteracts host cell immune responses  
73 by phosphorylation and inactivation of host Immunity-Related GTPase (IRG) proteins, which  
74 otherwise act to signal PV degradation (12). Other *Toxoplasma* kinases known to be secreted  
75 into the host cell include WNG1 and WNG2, formerly ROP35 and ROP34 respectively (13).  
76 Additionally, several pseudokinases have been shown to be secreted into the host and are  
77 implicated in host-cell manipulation such as ROP5, which complexes with ROP18 conferring  
78 binding affinity to host IRGA6 (12).

79 Whether secreted phosphatases play a similarly important role as do secreted kinases and  
80 pseudokinases remains largely unexplored. The secreted phosphatase PP2C has been  
81 proposed to reduce apoptosis of infected host cells (14) and the phosphatase PP2C-hn has  
82 been found in the host nucleus (15), although its function remains unclear. To expand our  
83 understanding of phosphatases secreted to either the host or PV, we bioinformatically  
84 identified 32 proteins predicted to have both a phosphatase domain and signal sequence. Of  
85 those identified, we characterized the biological role of TGGT1\_228170 which was previously  
86 identified as part of the inner membrane complex and named IMC2A by Mann and Beckers  
87 (16). However, contrary to the initially documented localization, this protein contains

88 characteristics of secreted proteins namely a signal sequence and predicted TEXEL motifs,  
89 protease cleavage sites found in many *Toxoplasma* secreted proteins (17). Here we show that  
90 this protein is both processed and secreted into the PV where it interacts with the proposed  
91 translocation complex of MYR1/2/3. Importantly, we show that TGGT1\_228170, now renamed  
92 GRA44, is critical for activation of the host oncogenic factor cMYC.

93

## 94 RESULTS

### 95 Bioinformatic search for secreted phosphatase

96 To begin identifying putative secreted phosphatases, we used a bioinformatics approach  
97 starting with all proteins annotated in the *Toxoplasma gondii* genome database ToxoDB  
98 ([toxodb.org](http://toxodb.org)). A blast search of all *Toxoplasma* genes, filtered by only including genes whose  
99 products contain predicted phosphatase domains and signal peptides, generated a list  
100 containing 32 proteins of potential interest (Table S1 in supplemental material). To prioritize  
101 our studies on phosphatases that are likely to play an important role in parasite propagation,  
102 we ranked our list according to gene fitness scores as assigned through a genome-wide  
103 CRISPR/Cas9 knockout study (18). Among these is TGGT1\_228170, a protein that contains a  
104 predicted acid phosphatase domain (Fig. 1A) and, that despite having a signal sequence, was  
105 previously described as localizing to the inner membrane complex (IMC) (16). However,  
106 multiple lines of evidence suggest that it may indeed be secreted. First, the homologous  
107 protein UIS2 in the related apicomplexan parasite *Plasmodium berghei* has been shown to  
108 have a secreted ortholog (Pf3D7\_1464600) in *Plasmodium falciparum* (19). Second,  
109 TGGT1\_228170 has been repeatedly detected in BioID experiments as an interactor of  
110 proteins localized to the PV lumen and PV membrane microenvironments (20). Finally,  
111 analysis of the protein sequence revealed multiple putative ***Toxoplasma* Export Elements**  
112 (TEXEL), which at the time this investigation began was defined as RxLxD/E (21), and has  
113 since been refined as RRL (22). TEXEL sequences are recognized by a Golgi-associated  
114 protease, aspartyl protease V (ASP5), which cleaves proteins as part of the secretory pathway  
115 to the PV/PVM and host cell. Based on these criteria and the fact TGGT1\_228170 was

116 assigned a gene knockout fitness score of -3.28, indicating that it substantially contributes to  
117 parasite fitness, we decided to revisit the localization and function of this protein.

### 118 **TGGT1\_228170 is processed and secreted into the parasitophorous vacuole**

119 To determine the localization of TGGT1\_228170, we introduced sequences encoding three  
120 C-terminal hemagglutinin epitope tags (3xHA) into the endogenous gene by homologous  
121 recombination (Fig. 1A). Western blot analysis of protein extract from both intracellular and  
122 extracellular parasites of the TGGT1\_228170(HA) line showed a band of approximately  
123 180kDa, which is the expected size for the full protein (Fig. 1B). However, a second prominent  
124 band at approximately 40kDa was also noted in both intracellular and extracellular parasites  
125 (Fig. 1B). This second smaller band is consistent with processing at either of two areas with  
126 homology to TEXEL sites (Fig. 1A). The sequence for the first of these putative cleavage sites  
127 is RELEE (amino acids 1205-1209), which is consistent with previous TEXEL consensus, while  
128 the sequence for the second is RRLLE (amino acids 1348-1352), which is consistent with the  
129 RRL consensus sequence (Fig. 1A).

130 To confirm the identity of the 40kDa fragment observed in western blot, endogenously  
131 tagged TGGT1\_228170 was immunoprecipitated and the eluate separated by SDS-PAGE.  
132 Both the 180kDa (long) and 40kDa (short) bands were excised from the PAGE gel and  
133 analyzed separately by mass spectrometry (M/S). Results confirmed both bands  
134 corresponded to TGGT1\_228170. For the long form, we detected 192 peptides distributed  
135 throughout the full protein sequence (Fig. 1C). M/S analysis of the band migrating to 40kDa  
136 revealed 74 peptides of which 60 were located after the second putative cleavage site (Fig.  
137 1C). Thus, TGGT1\_228170 is processed and both the full-length and C-terminal forms are  
138 stable.



139 Finally, to determine the localization of TGGT1\_228170, we performed  
140 immunofluorescence assays (IFA) of TGGT1\_228170(HA) parasites. Consistent with the  
141 presence of a signal sequence and putative TEXEL sites, TGGT1\_228170 was detected within  
142 the PV lumen and at the PV membrane (PVM; Fig. 1D). Based on this localization and  
143 corroborative findings by Coffey et al. on the same protein (13), TGGT1\_228170 should be  
144 designated as a GRA protein, and we will henceforth refer to it as GRA44.

#### 145 **Amino acids 1348-1352 are required for efficient processing of GRA44**

146 We hypothesized that the small C-terminal fragment of GRA44 detected by Western blot  
147 and M/S is the product of cleavage at either of the two putative TEXEL sequences. To  
148 investigate which of the two sites is actively cleaved, we exogenously expressed GRA44 with  
149 the first arginine of either or both of these sites mutated to alanine (Fig. 2A). The first arginine  
150 of TEXEL sites has been previously shown to be important for cleavage (21). Western blot  
151 analysis showed that mutating the first arginine of the first putative site (GRA44 R1205A) did  
152 not affect processing of the protein (Fig. 2B). By contrast, mutating the arginine in the second  
153 site (GRA44 R1348A) significantly reduced processing (Fig. 2B). The same result was  
154 observed when both putative TEXEL sites were mutated (GRA44 R1205A/R1348A) (Fig. 2B).  
155 Densitometry analysis showed that while for the wild type protein  $82.9\% \pm 9.9$  (n=3) of total  
156 protein is cleaved, cleavage in the GRA44 R1348A is  $47.4\% \pm 9.9$  (n=3). Thus, it appears that  
157 the second TEXEL is the site for processing of GRA44, and it is referred to as the GRA44  
158 TEXEL from now on. For a thorough examination of the identified TEXEL, we generated  
159 parasites exogenously expressing GRA44 in which either L1350 or E1352 are mutated for  
160 alanine (Fig. S1A in supplemental material). As was the case for the R1348A mutation,  
161 changing the central leucine in the GRA44 TEXEL to an alanine disrupted processing (Fig.

162 S1B in supplemental material), however mutant E1352A showed similar levels of processing  
163 as the wildtype protein (Fig. S1B in supplemental material).

164 Although we observed a significant reduction in cleavage after altering single amino acids  
165 in the GRA44 TEXEL, there appeared to be some residual C-terminal cleavage product  
166 present with all mutants (Fig. 2B and S1B). To ascertain whether this was the effect of  
167 persistent cleavage at TEXEL despite the mutations or cleavage at an alternative site, we  
168 generated an exogenously expressed GRA44 mutant in which all five amino acids that make  
169 up this TEXEL were deleted ( $\Delta$ 1348-1352). As expected, deletion of the TEXEL resulted in  
170 significant loss of the C-terminal cleavage product (Fig. 2C). However, it was evident there still  
171 remained a measurable amount being cleaved. Cleavage level for  $\Delta$ 1348-1352 was calculated  
172 at  $21.1 \pm 7.7$  (n=3), which is significantly lower than the point mutant R1348A (see above).  
173 Since the TEXEL was not present in this mutant form of GRA44, it is plausible that a cryptic  
174 site is used, potentially amino acids 1205-1209. Alternatively, GRA44 may be cleaved by a  
175 TEXEL/ASP5 independent mechanism.

176 To determine whether effective processing is needed for localization of GRA44 to the PV,  
177 we performed IFAs with parasites expressing each of the four mutant GRA44 (R1205A,  
178 R1348A, R1205A/R1348A, and  $\Delta$ 1348-1352). Interestingly, none of the mutations affected  
179 secretion and localization to the parasitophorous vacuole (Fig. 2D). Similarly, mutating L1350  
180 or E1352 within the confirmed TEXEL site did not affect the PV localization of GRA44 (Fig.  
181 S1C in supplemental material). These results indicate that complete processing is not required  
182 for protein secretion.

183 **Both the N-terminal and C-terminal GRA44 cleavage products localize within the PV**

184 As the localization analysis performed depended on a C-terminal HA epitope tag and  
185 GRA44 is cleaved at an internal TEXEL site, we could only detect the full-length uncleaved  
186 protein and smaller C-terminal fragment. Consequently, with the C-terminal HA tagged protein  
187 we cannot determine the localization of N-terminal cleavage product, which contains the  
188 putative acid phosphatase domain. Accordingly, we engineered a strain exogenously  
189 expressing GRA44 containing a MYC epitope tag inserted between amino acids 1203 and  
190 1204 in addition to the HA epitope tag at the C-terminus (Fig. 3A). Protein extracts from  
191 parasites expressing the dually tagged GRA44 were analyzed by western blot, and probed  
192 separately with antibodies against the MYC or HA epitopes (Fig. 3B). Probing anti-MYC  
193 uncovered a band at approximately 140kDa in addition to the 180kDa full length protein (Fig.  
194 3B). This 140 kDa correlates to the expected N-terminal end of GRA44 post-cleavage. As  
195 observed previously, probing with antibodies against the HA epitope revealed the full-length  
196 GRA44 and the C-terminal fragment. Having established a parasite line that allows monitoring  
197 of two post-processing fragments of GRA44, we investigated their respective localization by  
198 IFA. Regardless of whether we used HA or MYC antibodies, the protein was localized primarily  
199 to the PV, which suggests that the two major fragments, including the one containing the  
200 phosphatase domain, are secreted into the parasitophorous vacuole (Fig. 3C).

201 **Loss of GRA44 negatively affects parasite propagation**

202 Through a genome wide CRISPR screen, GRA44 was assigned a  $\log_2$  relative fitness  
203 score of -3.28 (18), which would suggest that loss of GRA44 would be a significant detriment  
204 to parasite propagation. Accordingly, we applied a tetracycline (tet) repressible system (23, 24)  
205 to establish a conditional GRA44 knockdown strain. Specifically, we used CRISPR to introduce

206 a cassette encoding a drug selective marker, a transactivator (TATi) protein and a tetracycline  
207 response element (TRE) just upstream of the endogenous GRA44 start codon (Fig. 4A). As to  
208 be able to monitor GRA44 protein expression we engineered the conditional knockdown  
209 mutant using the GRA44(HA) strain. The resulting strain, TATi-GRA44(HA) was grown for 24  
210 and 48 hours in the absence and presence of the tetracycline analog anhydrotetracycline  
211 (ATc) and GRA44 expression was monitored by Western blot (Fig. 4B) and IFA (Fig. 4C). At  
212 both time points, protein levels are significantly reduced in presence of ATc when observed by  
213 either Western blot or IFA (Fig. 4B and C). Thus, we successfully established a strain in which  
214 expression of GRA44 can be conditionally turned down.

215 Interestingly, we noted the small C-terminal fragment from the TATi-GRA44(HA) strain was  
216 smaller than what is observed with the parental endogenous HA strain (Fig. 1B and 4B).  
217 Sequencing of GRA44 in the TATi-GRA44(HA) strain showed that a 315 base pair fragment,  
218 which encodes the last 105 amino acids, was deleted leaving the HA tag in frame. Surprisingly,  
219 we did not note any significant growth defect and successfully complemented with a full-length  
220 gene construct (Fig 4D, comparing parental to knockdown strain grown without ATc). Thus,  
221 deletion of that region does not affect localization or function. Regardless, this strain allows us  
222 to study the consequence of eliminating GRA44 expression upon ATc addition. In addition, to  
223 ensure that any phenotype is due to downregulation of GRA44 we complemented this strain  
224 with the addition of a wildtype copy of the gene (see below). Importantly, when the TATi-  
225 GRA44(HA) strain is grown in the presence of ATc, depleting GRA44, propagation is  
226 significantly affected as compared to the growth by the same strain under normal conditions  
227 (Fig. 4D). For the conditional knockdown strain, in the absence of ATc, we quantitated an  
228 average cell clearance of  $19.4 \pm 9.9\%$ , which was reduced to  $0.9 \pm 0.4\%$  when ATc was included

229 in the growth medium (Fig. 4D). Therefore, conditional knockdown of GRA44 significantly  
230 reduces parasite propagation in tissue culture.

### 231 **Processing is not necessary for GRA44 function**

232 To confirm the propagation defect observed upon knockdown of GRA44 was due to the  
233 reduction of GRA44 levels, we tested whether an exogenous copy of GRA44 could  
234 complement the phenotype. For this purpose, we introduced a copy of GRA44 with a C-  
235 terminal MYC epitope tag into the TATi-GRA44(HA) strain to generate a complemented strain  
236 TATi-GRA44(HA)comp, (Fig. 5A). The exogenous copy of GRA44(MYC) is processed and  
237 secreted as expected (Fig. 5B and C). In absence of ATc, both the endogenous HA-tagged  
238 GRA44 and the exogenous MYC-tagged GRA44 were detected in this strain by both Western  
239 blot and IFA (Fig. 5B and C). As expected, addition of ATc resulted in knockdown of  
240 GRA44(HA) but not of the exogenous GRA44(MYC) (Fig. 5B and C). Plaque assay of both the  
241 knockdown (TATi-GRA44(HA)) and complemented (TATi-GRA44(HA)comp) strains with and  
242 without ATc were performed in parallel to determine the ability of GRA44 to complement the  
243 phenotype. Consistent with the previous result, addition of ATc to the TATi-GRA44(HA) strain  
244 severely impaired plaque formation (Fig. 5D). Importantly, presence of a constitutively  
245 expressed copy of GRA44 complements this phenotype (Fig. 5D). While the percentage  
246 clearance of host cell in the presence of ATc was  $0.8 \pm 0.4\%$  for the knockdown strain after five  
247 days in culture, it was  $26.6 \pm 3.7\%$  for the complemented strain, which is statistically equal to  
248 what is observed without ATc with either strain (Fig. 5D). Complementation of the plaquing  
249 phenotype by the addition of a wildtype copy confirms that GRA44 is critical for efficient  
250 propagation of *Toxoplasma*.

251 Having established complementation of the growth phenotype, we set to determine  
252 whether processing of GRA44 was needed for function. Accordingly, we complemented the  
253 TATi-GRA44(HA) strain with an exogenous copy of GRA44(MYC) containing a TEXEL deletion  
254 of residues 1348-1352 to obtain the strain GRA44comp $\Delta$ TXL. For the GRA44comp $\Delta$ TXL strain  
255 under normal growth conditions without ATc, endogenous GRA44(HA) is detected by Western  
256 blot at a similar size to TATi-GRA44 and TATi-GRA44comp strains, however the exogenous  
257 MYC-tagged GRA44comp $\Delta$ TXL copy is seen as a mostly uncleaved form of the protein, in  
258 contrast to the wild type complement which is processed (Fig. 5E). Remarkably, the  
259 GRA44comp $\Delta$ TXL complemented parasite strain was no longer sensitive to the presence of  
260 ATc (Fig. 5E). These results indicate that complete cleavage of GRA44 is not necessary for  
261 function.

## 262 **GRA44 interacts with members of the effector translocation complex**

263 Our results have thus far shown GRA44 to be of significant importance for successful  
264 parasite propagation, however the specific function of this protein within the parasitophorous  
265 vacuole is unclear. To shed light on its function we examined what proteins interact with  
266 GRA44 by developing a comprehensive interactome. For this purpose, GRA44 protein was  
267 immunoprecipitated from the GRA44(HA) tagged line and co-precipitating peptides analyzed  
268 by mass spectrometry. After three replicate experiments and controls with non-specific beads,  
269 the data were statistically analyzed by SAINT (Significant Analysis of Interactome) (25)  
270 computational predictive analysis (supplemental data set 1). With a SAINT score of >0.8 used  
271 as a cutoff, we obtained a list of 35 putative interactors, of which 8 are ribosomal and snRNP  
272 proteins and likely to be non-specific (Table S2 in supplemental material). Significantly, of the  
273 remaining 27 putative interactors, 23 have predicted signal peptides, which indicates that they

274 are likely secreted proteins (Table 1). Among these are eight known GRA proteins (GRA9, 16,  
275 25, 33, 34, 45, 50, and 52), the parasitophorous vacuole membrane associated protein MAF1,  
276 and MYR1 a known member of the effector translocation complex (26, 27).

277 To confirm the interaction with MYR1, for which there are antibodies (26), we performed  
278 co-immunoprecipitating assays. Purified lysate from GRA44(HA) parasites was precipitated on  
279 mouse anti-HA beads, and eluates evaluated by Western for presence of GRA44 and MYR1.  
280 For MYR1, which is also processed by ASP5 at a TEXEL site, we probed with antibodies for  
281 either the C-terminal or N-terminal cleavage product. Immunoprecipitated GRA44 yielded a  
282 significant amount of either MYR1 fragment as compared to control IgG bead eluate of the  
283 same source (Fig. 6). Thus, GRA44 appears to interact with a member of the effector  
284 translocation system.

### 285 **GRA44 is required for cMYC induction**

286 MYR1 was identified through a forward genetic screen to be required for translocation of  
287 parasite effectors such as GRA16 and GRA24 and the ensuing upregulation of the host cell  
288 oncogene cMYC (26). Given GRA44's interaction with MYR1, we tested whether it might be  
289 involved in the same functions, specifically cMYC induction. For this purpose, TATI-  
290 GRA44(HA) parasites were grown for 24 hours either with or without ATc, released from host  
291 cells and allowed to infect new cells. Those that came from the +ATc conditions were kept in  
292 ATc, while those from the -ATc culture were kept without it. After 12 hours of growth, cultures  
293 were fixed and an IFA for human cMYC was performed (Fig 7). Images of merged phase  
294 contrast microscopy, HA, MYC, DAPI and cMYC staining were used to locate host cells  
295 infected by single PVs of greater than 1 parasite per vacuole and single channel images of  
296 cMYC staining were quantitated within these host nuclei boundaries by ImageJ software.

297 Addition of ATc to TATi-GRA44(HA) parasites produced a reduction significantly reduced the  
298 level of GRA44 (Fig. 7A) detected consistent with the results observed by western blot and  
299 importantly reduced the cMYC signal by approximately 5-fold, a significantly dampened  
300 response as compared to normal conditions with the same strain (Fig. 7B). No significant  
301 difference in cMYC signal was observed in the complemented strain upon ATc addition.

302



## 303 **DISCUSSION**

304 As part of its lifecycle, *Toxoplasma* invades and dwells within host cells where it utilizes  
305 nutrient resources readily available within a host. Since residence inside a host is key to  
306 parasite survival and propagation, *Toxoplasma* parasites have multiple means of altering the  
307 status of their host to better suit their needs. Examples of changes induced within the host  
308 include apoptosis inhibition (14), innate immune system disruption (28), host cytoskeleton  
309 restructuring (29) and global changes to host gene transcription (9). These critical host cell  
310 alterations are accomplished by a large arsenal of parasite effectors that are secreted into the  
311 host cell during invasion and intracellular growth. Secretion of these effectors involve highly  
312 coordinated actions by two unique parasite organelles: the rhoptries and the dense granules.  
313 The rhoptries discharge proteins known as ROPs during invasion, while the dense granules  
314 release their contents into the PV during intracellular growth. While some of these so called  
315 GRA proteins remain within the PV space or associate with the PV membrane (PVM), many of  
316 them are translocated across the PVM into the host where they affect numerous signaling  
317 pathways. How these proteins move from the PV to the host is becoming clear with the  
318 discovery of proteins that appear to form part of a putative translocon (24). The work presented  
319 here shows that GRA44 (TGGT1\_228170), previously known as IMC2A (16), interacts with  
320 members of this complex and that it is essential for some of the host cell events downstream of  
321 effector translocation.

322 Work from Coffey et al. identified GRA44 as a substrate of ASP5 through a comparative  
323 proteomic approach (13). They showed that indeed GRA44 is processed and secreted into the  
324 PV, which we have corroborated with the work presented here. Their analysis of GRA44  
325 identified two cleavage sites, one at 83-85 and another at 1348-1350. Nonetheless, their

326 studies did not determine whether all cleavage products were secreted or the function/role of  
327 GRA44 within the PV. Here we report that the two major GRA44 products are secreted into the  
328 PV. This is important as it is the first evidence that the fragment containing the putative acid  
329 phosphatase is indeed in the PV. In our study, we show that the processing is not necessary  
330 for either the secretion or function of GRA44. This is consistent with the fact that other  
331 secreted proteins containing TEXEL motifs such as MYR1 and WNG1/2 can still be secreted in  
332 absence of ASP5 activity (13). Fortuitously, through a spontaneous deletion in the knockdown  
333 strain, we also determined that the last 105 amino acids of the protein are not needed for  
334 function or localization.

335 Proteomic analysis of proteins co-immunoprecipitated with GRA44, reveal interaction  
336 with known secreted proteins, including numerous GRAs. Among these interactors are GRA9,  
337 part of the intravacuolar tubular network (30), GRA16 an effector altering host cell cycle  
338 through p53 pathway (31), GRA25 a macrophage-dependent immune modulator (32), GRA33,  
339 GRA34, GRA45, GRA50, GRA52 and members of the multi-copy Mitochondrion Association  
340 Factor 1 (MAF1) family. MAF1 is involved in recruiting the host mitochondria to the PV  
341 membrane surface (33). Most importantly, immunoprecipitation revealed an interaction  
342 between MYR1 and GRA44, which we have confirmed independently by Western blotting (Fig.  
343 6). Interestingly, as we were studying the interactome of GRA44 we learned of ongoing work in  
344 Dr. Boothroyd's lab showing a physical and functional interaction between MYR1 and GRA44  
345 (see accompanying manuscript). MYR1 was initially identified through a forward genetic  
346 screen for *Toxoplasma* mutants unable to activate host cMYC and translocate effectors such  
347 as GRA16 and GRA24 (22). Further screening for such mutants identified MYR2 and MYR3  
348 as also required for effector translocation (27). Thus, MYR1/2/3 appear to be part of a putative

349 translocon complex, although only MYR1 and MYR3 have been confirmed to directly interact  
350 (27). MYR1-dependent effectors are responsible for driving a broad range of host cell effects  
351 early on during infection. MYR1-dependent host responses include upregulation of E2F  
352 transcription factors and downregulation of interferon signaling (8). The interaction between  
353 GRA44 and MYR1 would suggest a function in translocation for this putative acid  
354 phosphatase.

355 One of the challenges in determining the relevance of interactions among dense granule  
356 proteins is that those interactions could be within the dense granules or during transit and not  
357 necessarily once in the PV or host where they exert their function. Nonetheless, our data  
358 strongly suggest that the interaction with MYR1 is functionally relevant. Similar to knockout of  
359 MYR1, knockdown of GRA44 results in significant reduction of cMYC activation. Together,  
360 these findings support the notion that GRA44 is a member of the MYR1/2/3 translocon  
361 machinery. Whether its role in this process is structural or regulatory remains unknown and  
362 would require further investigation. The possibility that GRA44 plays a regulatory function is  
363 suggested by the presence of a putative catalytic site reminiscent of acid phosphatases.  
364 Whether GRA44 is an active phosphatase or a pseudophosphatase remains to be determined.

365 In the biology of animals, plants and fungi, acid phosphatases serve many biological  
366 purposes and proteins are designated as such based on a shared similarity in catalytic site  
367 structural arrangement (34). Typically these enzymes coordinate an Fe(III) and divalent metal  
368 such as Mn(II), Zn(II) or Fe(II) as part of their active site. Each metal is coordinated to three  
369 amino acids and shares a linking aspartic acid bridge between them with the Fe(III) typically  
370 mated to a histidine, an asparagine and a tyrosine and the divalent metal bound by two  
371 histidines and an asparagine. GRA44 contains a majority of the conserved residues common

372 to acid phosphatases. In GRA44 the aspartic acid conjugating the Fe(III) is switched to an  
373 asparagine and the asparagine conjugating the second metal is replaced by a glutamic acid.  
374 This would represent a swap in charged amino acids, and should still maintain a stable charge  
375 equilibrium within the active site. The only coordinating residue unaccounted for is the tyrosine  
376 binding Fe(III). The active site of GRA44 could then be hypothesized to consist of an Asp  
377 bridge between the first metal M(II), bound by a glutamic acid and two histidines, and the  
378 second metal M(III), bound by an asparagine, a histidine, and an unknown seventh residue.

379 Acid phosphatases commonly scavenge, recycle and transport inorganic phosphorous,  
380 and have been implicated in various biological functions, such as downregulation of prostate  
381 cell growth signaling and osteoclast bone resorption activity (35, 36). Acid phosphatases have  
382 also been implicated in phosphate acquisition from organophosphate compounds and  
383 dephosphorylative regulation of enzymes in plants (37, 38). GRA44 function, at least in part, is  
384 likely related to its interactions with the MYR translocon in the PV. Two plausible functions for  
385 GRA44 could be regulation of MYR component proteins by dephosphorylation or  
386 dephosphorylation of effectors for trafficking across the PVM structure. Typically, proteins must  
387 be dephosphorylated to cross a lipid bilayer membrane such as the PVM and notably both  
388 GRA16 and GRA24 have been shown to be phosphorylated as identified by *Toxoplasma*  
389 phosphoproteome analysis (39)). MYR3 also exists in a partial phosphorylated state and could  
390 be a substrate for a phosphatase such as GRA44 (27). Consistent with the idea of  
391 phosphoregulation of the export system, the secreted kinase ROP17 has been shown to be  
392 critical for efficient effector translocation (40).

393 Besides the defect in cMYC activation, genetic disruption of GRA44 results in a  
394 propagation defect. This result is congruent with published work describing the effect of

395 complete GRA44 knockout (13) and with the fitness score of -3.28 assigned to GRA44 through  
396 a genome wide CRISPR screen (18). This is particularly interesting, as disruption of other  
397 translocon members do not affect fitness to the level seen with GRA44. For example, the  
398 relative fitness scores for MYR1, MYR2, MYR3 are 0.88, 2.39 and 2.83 respectively, although  
399 disruption of any of these interferes with effector translocation and cMYC activation. Similarly,  
400 disruption of the effectors GRA16, GRA24 and TgIST, which depend on MYR1 for  
401 translocation, have positive fitness scores of 1.44, 2.28 and 2.86. Thus, it is unlikely that the  
402 growth defect exhibited by parasites lacking GRA44 is due to defects on effector translocation.  
403 Alternatively, GRA44 might play several independent roles, including nutrient acquisition,  
404 which would be consistent with known functions of acid phosphatases.

405 In conclusion, we have shown GRA44 to be a secreted protein critical for *Toxoplasma*  
406 survival and propagation that plays a significant role in host manipulation and interacts with the  
407 translocon protein MYR1. As part of its secretion to the PV it is cleaved at an internal TEXEL  
408 site forming two stable and colocalizing proteins. The mechanistic action by which GRA44 is  
409 involved with protein secretion to host cells remains unknown, however due to its putative acid  
410 phosphatase domain, involvement with dephosphorylation of trafficked proteins or members of  
411 the translocon complex is plausible. Future work on the activity and substrates of GRA44 will  
412 shed light on the regulation of effector translocation, a process central to the interactions  
413 between *Toxoplasma* and its host.

414

## 415 **MATERIALS AND METHODS**

### 416 *Parasite and Host Cell Culture*

417 All parasite lines were maintained by continuous passage through human foreskin  
418 fibroblasts (HFFs) purchased from ATCC. Parasites and HFFs were grown in Dulbecco's  
419 Modified Eagle Medium (DMEM) supplemented with 10% fetal bovine serum (FBS), 2mM/L  
420 glutamine and 100 units penicillin/100µg streptomycin/ml. When pyrimethamine was included  
421 in media for selection, dialyzed FBS was used. All parasite and HFF cultures were grown in a  
422 humidified incubator at 37°C with 5% CO<sub>2</sub>. Initial parental parasite lines used were RH strain  
423 lacking hypoxanthine-xanthine-guanine phosphoribosyl transferase (HPT) gene, referred to as  
424 RHΔ*hpt* (41), and RH strain lacking HPT and Ku80, referred to as RHΔ*ku80* (42, 43). For drug  
425 treatment and selection, stocks of pyrimethamine and chloramphenicol were prepared in  
426 ethanol, stocks of anhydrotetracycline (ATc) were prepared in DMSO. All drugs were  
427 purchased from Sigma.

### 428 *Endogenous epitope tagging*

429 For C-terminal endogenous tagging of TGGT1\_228170, the 3' region directly upstream of  
430 the stop codon was amplified from RhΔ*ku80* parasite genomic DNA by PCR and inserted into  
431 the pLIC-3xHA-DHFR (43) vector at the PaeI restriction site by ligation independent cloning  
432 (LIC) facilitated by InFusion HD Cloning Plus (Clontech). Sequences of primer for this and all  
433 reactions used in this work are in supplemental table S3. 50µg of XcmI linearized vector was  
434 transfected into RhΔ*ku80* parasites and the resultant population was selected for the presence  
435 of the pyrimethamine resistant dihydrofolate reductase (DHFR) allele, which is included in the  
436 vector (44). Independent clones were established by limiting dilution of the transfected  
437 population and confirmed by immunofluorescence assay and Western blots.

438 *Exogenous gene insertion and parasite line generation*

439 To introduce an exogenous copy of TGGT1\_228170 into parasites, we first generated a  
440 vector containing a section of the genomic TGGT1\_228170 locus beginning from the start  
441 codon to the stop codon that included introns and a C-terminal HA epitope. The section of  
442 TGGT1\_228170 in the vector was flanked by the *Toxoplasma* tubulin promoter and 5'UTR and  
443 the tubulin 3'UTR. This was achieved by cloning a PCR amplicon of the TGGT1\_228170  
444 genomic DNA (primers in table S3) into the NcoI and PaeI sites of pTNRIuc-Tub-HPT (45)  
445 using InFusion HD Plus for LIC. 50µg of the resulting vector, pTub-Gra44-HPT, linearized with  
446 Scal, was transfected into RhΔ*hpt* parasites. The transfected population was selected for HPT  
447 by adding mycophenolic acid (50µg/mL) and xanthine (50µg/mL) to the media. Independent  
448 clones were established by limiting dilution. For mutant variations of the exogenously  
449 expressed TGGT1\_228170, TEXEL deletions, myc epitope tag insertion and TEXEL2 point  
450 mutations were introduced into pTub-Gra44-HPT using the Q5 site directed mutagenesis kit  
451 (NEB) and TEXEL point mutations were accomplished similarly with Quikchange site-directed  
452 mutagenesis kit (Agilent).

453 *Development of GRA44 conditional knockdown parasite line*

454 To generate the GRA44 conditional knockout strain we introduced a cassette encoding a  
455 drug selective marker, a transactivator (TATi) protein and a tet response element (TRE) just  
456 upstream of the GRA44 start codon. This TATi cassette was amplified from the vector  
457 pT8TATi-Gra44-HX-tetO7S (46) with primers that include areas of homology upstream of  
458 GRA44 to facilitate homologous recombination. 1µg of this PCR amplicon was transfected into  
459 the RhΔKu80 parasites that express endogenously HA tagged GRA44. To drive the insertion  
460 of the TATi cassette we co-transfected the PCR amplicon with 2µg of a vector expressing

461 Cas9 and a guide RNA targeting the TGGT1\_228170 locus upstream of the start codon. This  
462 vector was made using pSAG1-Cas9-GFP-pU6-sgUPRT (47) as a template and the  
463 sequences encoding the guide RNA were introduced with Q5 site directed mutagenesis (NEB).  
464 Parasites transfected with the TATi cassette and Cas9 vector were selected for HPT and  
465 independent clones established by limiting dilution. Correct integration of the TATi insert  
466 cassette was validated by PCR. Resulting strain was designated TATi-GRA44(HA).

#### 467 *Complementation of conditional knockdown line*

468 To complement the knockdown strain, a wildtype copy of TGGT1\_228170 driven by a  
469 *Toxoplasma* tubulin promoter and including a C-terminal MYC epitope tag was targeted to the  
470 inactive Ku80 locus of the TATi-GRA44(HA) strain using CRISPR/Cas9 to assist integration.  
471 The insertional cassette, which includes the tubulin-driven TGGT1\_228170 and a  
472 chloramphenicol resistance gene (48) was amplified by PCR from plasmid pTub-Gra44-myc-  
473 CmR with primers that included homology segments to the Ku80 locus (table S3). The pTub-  
474 Gra44-myc-CmR vector was constructed with Infusion assisted LIC cloning by inserting the  
475 Gra44 gene with appended C-terminal myc tag, amplified from pTub-Gra44-HPT, to the pLIC-  
476 SMGFP-CmR vector backbone (49) replacing the SMGFP tag and upstream region. 1 µg of this  
477 PCR amplicon was co-transfected with 2 µg of Cas9 vector encoding an sgRNA targeting the  
478 Ku80 locus.

#### 479 *SDS-PAGE and Western blot analysis*

480 For detection of protein in lysates from extracellular parasite samples, parasites were  
481 allowed to undergo natural egress then collected, centrifuged and washed 2x with cold PBS  
482 (10 min, 1,000 x g). For analysis of intracellular parasite protein lysates, host cell monolayers  
483 were washed 2x with cold PBS, scraped and centrifuged for 10 minutes at 1,000 x g. Parasite



484 samples were resuspended in 2X sample loading buffer with 5%  $\beta$ -mercaptoethanol and boiled  
485 for 5 minutes at 98°C. Boiled samples were frozen at -20°C, then thawed and re-boiled for 5  
486 minutes at 98°C before gel loading. SDS-PAGE and Western blots were performed with  
487 standard methods as previously described (50).

488 For Western blot analysis of GRA44 conditional mutant strains, parasites were first grown  
489 under normal conditions for 24 hours, then syringe lysed with a 27-gauge needle. Fresh host  
490 cells were infected with an equal quantity of syringe lysed parasites and grown for 24 or 48  
491 hours with or without 1 $\mu$ g/mL ATc. For analysis of protein lysates from extracellular parasite  
492 samples, host cells were scraped and parasites released by passing through a syringe and  
493 centrifuged 10 minutes at 1,000 x g. For analysis of intracellular parasite protein lysates, host  
494 cell monolayers were washed with cold PBS, scraped and centrifuged for 10 minutes at 1,000  
495 x g. Resulting samples were resuspended in 200  $\mu$ L RIPA lysis buffer (50mM Tris, 150 mM  
496 NaCl, 0.1% SDS, 0.5% sodium deoxycholate, 1% TritonX-100) including  
497 protease/phosphatase inhibitor cocktail (Cell Signaling Technology) and incubated on ice 1  
498 hour, sonicated 2 times for 15 seconds with 1 minute rests on ice and centrifuged (20,000 x g,  
499 15 minutes, 4°C). Supernatants were combined with 4X SDS loading buffer with 10%  $\beta$ -  
500 mercaptoethanol and boiled for 5 minutes at 98°C. Boiled SDS samples were frozen at -20°C,  
501 then thawed and re-boiled for 5 minutes at 98°C before gel loading. SDS-PAGE and Western  
502 blots were performed with standard methods as described above. Uncropped original images  
503 for all western blots are included as a supplemental data set 2.

504 Primary antibodies used for western blots included rabbit anti-HA at a dilution of 1:1,000  
505 (Cell Signaling Technologies), rabbit anti-MYC at a dilution of 1:1,000 (Cell Signaling  
506 Technologies), mouse anti-SAG1 at a dilution of 1:2,000 (Genway), and mouse anti-Myr1

507 antibodies at 1:1,000 (26, 27). Secondary antibodies used include peroxidase-conjugated goat  
508 anti-mouse and anti-rabbit and were used at a 1:10,000 dilution.

### 509 *Immunofluorescence assays*

510 For all immunofluorescence assays (IFA), HFFs were grown to confluency on 1.5mm glass  
511 coverslips and infected with parasites, which were allowed to grow for 20 hours prior to fixation  
512 with 4% paraformaldehyde for 20 minutes. Cells were washed 1x with PBS after fixation, then  
513 permeabilized and blocked with a solution of 3%BSA/0.2%Triton-X100 in PBS for 15-20  
514 minutes. Coverslips were incubated with primary antibodies in 3%BSA/0.2%Triton-X100 in  
515 PBS for one hour at room temperature and washed five times with PBS. Finally, cultures were  
516 incubated with fluorophore-conjugated secondary antibodies for one hour at room temperature  
517 in 3%BSA in PBS, then washed five times with PBS and mounted on glass slides with  
518 vectashield mounting medium containing DAPI (Vector Laboratories). Primary antibodies used  
519 were rabbit anti-HA at 1:1000, mouse anti-MYC at 1:1000 (Cell signaling Technology), rat anti-  
520 HA at 1:2000 (Roche), rabbit anti-human C-myc at 1:1000 (Abcam), mouse anti-gra5 (Biotem)  
521 at 1:1000, and mouse anti-gra7 at 1:1000. Secondary antibodies used (Life Technologies)  
522 were Alexafluor-488 goat anti-rabbit or goat anti-rat, alexafluor-594 goat anti-mouse or Goat  
523 anti-Rabbit and Alexafluor-647 Goat anti-Mouse. All secondary antibodies were used at  
524 1:2000. Images were taken on a Nikon Eclipse 80i microscope using a Nikon DS-Qi1Mc  
525 camera and NIS Elements AR 3.0 software.

### 526 *Immunoprecipitation and Co-IP experiments*

527 Infected host cells were washed 2x with cold PBS and scraped from the flask surface to  
528 collect intracellular parasites, which were centrifuged 10 minutes at 1,000 x g and  
529 resuspended in 200  $\mu$ L ice cold IP lysis buffer (Pierce, Thermo Scientific) containing protease

530 and phosphatase inhibitors (Cell Signaling Technology). Lysate was incubated on ice one  
531 hour, sonicated on ice 2x for 15 seconds and centrifuged 15 minutes at 20,000 x g and 4°C.  
532 Supernatant was collected and incubated with magnetic beads conjugated to either mouse IgG  
533 or primary antibody (Pierce, Thermo Scientific) for one hour at 4°C with rocking. Incubated  
534 beads were separated from solution with a magnet and washed with IP lysis buffer (Pierce,  
535 Thermo) plus inhibitors three times and either stored in 8M Urea at -80°C for downstream  
536 mass spectrometric analysis or directly eluted into 2x SDS sample loading buffer/5% β-  
537 mercaptoethanol, boiled 5 minutes at 98°C, and stored at -20°C for Western blot analysis.  
538 SDS-PAGE and Western blots were performed as outlined above. Protein analysis by mass  
539 spectrometry was completed by Indiana University School of Medicine Proteomics Core facility  
540 as previously described (50).

#### 541 *Plaque assays*

542 12-well plates were infected with 500 parasites/well of freshly syringe-lysed parasites and  
543 grown undisturbed for 5 days before fixation with methanol for 5 minutes. Wells were stained  
544 with crystal violet and plaque images quantified by ImageJ using the ColonyArea plugin (50).

#### 545 *HFF cMYC response assay and quantitation*

546 Parasites used for C-myc assays were grown 48 hours with or without 1 µg/mL ATc and  
547 syringe-lysed prior to infection of host cell coverslips. Coverslips of confluent HFF monolayers  
548 pretreated for 24 hours with FBS-free media were infected and fixed 19 hours post infection.  
549 IFAs for human C-myc, HA and DAPI were performed as described above. Images of phase  
550 contrast, DAPI, HA, myc and C-myc channels were acquired for at least 20 vacuoles under  
551 each experimental condition and exported to ImageJ. Infected host cell nuclei were identified  
552 from merged-channel images and quantitated for C-myc expression from images of the C-myc

553 channel alone. Measurements were taken of mean pixel intensity within host nucleus  
554 boundaries of singly infected cells containing PVs greater than one parasite. Measurements  
555 from triplicate experiments were averaged.

## 556 **ACKNOWLEDGMENTS**

557 This work was funded by grants from the National Institutes of Health to GA (R01AI123457  
558 and R21AI138255). We would like to thank Jason True and other members of the Indiana  
559 University School of Medicine Proteomics Core facility for mass spectrometric sample analysis  
560 and data processing. In addition we would like to thank Alicja Cygan, Terence Theisen and Dr.  
561 John Boothroyd for collaborative discussions and sharing of reagents and unpublished data  
562 with regard to this work.

563

564 **REFERENCES**

- 565 1. Jones JL, Parise ME, Fiore E. 2014. Neglected parasitic infections in the United States:  
566 Toxoplasmosis. *American Journal of Tropical Medicine and Hygiene* 90:794–799.
- 567 2. Israelski D, Remington J. 1993. Toxoplasmosis in patients with cancer. *Clinical infectious*  
568 *diseases* 17 Suppl 2:S423-35.
- 569 3. Luft B, Remington J. 1992. Toxoplasmic encephalitis in AIDS. *Clinical Infectious Diseases*  
570 15:211–222.
- 571 4. Slavin M, Meyers J. 1994. *Toxoplasma gondii* infection in marrow transplant recipients: a  
572 20 year experience. *Bone marrow transplantation* 13:549–557.
- 573 5. Wong S, Remington J. 1994. Toxoplasmosis in pregnancy. *Clinical Infectious Diseases*  
574 18:853–861.
- 575 6. Hakimi M-A, Olias P, Sibley LD. 2017. *Toxoplasma* effectors targeting host signaling and  
576 transcription. *Clin Microbiol Rev* 30:615–645.
- 577 7. Blader IJ, Saeij JP. 2009. Communication between *Toxoplasma gondii* and its host: impact  
578 on parasite growth, development, immune evasion, and virulence. *APMIS* 117:458–476.
- 579 8. Naor A, Panas MW, Marino N, Coffey MJ, Tonkin CJ, Boothroyd JC. 2018. MYR1-  
580 dependent effectors are the major drivers of a host cell's early response to *Toxoplasma*,  
581 including counteracting MYR1-independent effects. *mBio* 9.

- 582 9. Saeij JPJ, Coller S, Boyle JP, Jerome ME, White MW, Boothroyd JC. 2007. *Toxoplasma*  
583 co-opts host gene expression by injection of a polymorphic kinase homologue. *Nature*  
584 445:324–7.
- 585 10. Taylor S, Barragan a, Su C, Fux B, Fentress SJ, Tang K, Beatty WL, Hajj HE, Jerome M,  
586 Behnke MS, White M, Wootton JC, Sibley LD. 2006. A secreted serine-threonine kinase  
587 determines virulence in the eukaryotic pathogen *Toxoplasma gondii*. *Science (New York,*  
588 *NY)* 314:1776–80.
- 589 11. Ong YC, Reese ML, Boothroyd JC. 2010. *Toxoplasma* rhoptry protein 16 (ROP16)  
590 subverts host function by direct tyrosine phosphorylation of STAT6. *The Journal of*  
591 *biological chemistry* 285:28731–40.
- 592 12. Hermanns T, Müller UB, Könen-Waisman S, Howard JC, Steinfeldt T. 2016. The  
593 *Toxoplasma gondii* rhoptry protein ROP18 is an Irga6-specific kinase and regulated by the  
594 dense granule protein GRA7. *Cell Microbiol* 18:244–259.
- 595 13. Coffey MJ, Dagley LF, Seizova S, Kapp EA, Infusini G, Roos DS, Boddey JA, Webb AI,  
596 Tonkin CJ. 2018. Aspartyl protease 5 matures dense granule proteins that reside at the  
597 host-parasite interface in *Toxoplasma gondii*. *MBio* 9.
- 598 14. Gao XJ, Feng JX, Zhu S, Liu XH, Tardieux I, Liu LX. 2014. Protein Phosphatase 2C of  
599 *Toxoplasma gondii* interacts with human SSRP1 and negatively regulates nell apoptosis.  
600 *Biomed Environ Sci* 27:883–893.

- 601 15. Gilbert LA, Ravindran S, Turetzky JM, Boothroyd JC, Bradley PJ. 2007. *Toxoplasma*  
602 *gondii* targets a protein phosphatase 2C to the nuclei of infected host cells. Eukaryotic cell  
603 6:73–83.
- 604 16. Mann T, Beckers C. 2001. Characterization of the subpellicular network, a filamentous  
605 membrane skeletal component in the parasite *Toxoplasma gondii*. Mol Biochem Parasitol  
606 115:257–268.
- 607 17. Tonkin ML, Beck JR, Bradley PJ, Boulanger MJ. 2014. The inner membrane complex sub-  
608 compartment proteins critical for replication of the apicomplexan parasite *Toxoplasma*  
609 *gondii* adopt a pleckstrin homology fold. The Journal of biological chemistry 289:13962–  
610 73.
- 611 18. Sidik SM, Huet D, Ganesan SM, Huynh M-H, Wang T, Nasamu AS, Thiru P, Saeij JPJ,  
612 Carruthers VB, Niles JC, Lourido S. 2016. A genome-wide CRISPR screen in *Toxoplasma*  
613 identifies essential apicomplexan genes. Cell 166:1423-1435.e12.
- 614 19. Khosh-Naucke M, Becker J, Mesén-Ramírez P, Kiani P, Birnbaum J, Fröhlke U, Jonscher  
615 E, Schlüter H, Spielmann T. 2017. Identification of novel parasitophorous vacuole proteins  
616 in *P. falciparum* parasites using BiOLD. Int J Med Microbiol.
- 617 20. Nadipuram SM, Kim EW, Vashisht AA, Lin AH, Bell HN, Coppens I, Wohlschlegel JA,  
618 Bradley PJ. 2016. In vivo biotinylation of the *Toxoplasma* parasitophorous vacuole reveals  
619 novel dense granule proteins important for parasite growth and pathogenesis. MBio 7.

- 620 21. Curt-Varesano A, Braun L, Ranquet C, Hakimi M-A, Bougdour A. 2016. The aspartyl  
621 protease TgASP5 mediates the export of the *Toxoplasma* GRA16 and GRA24 effectors  
622 into host cells. *Cell Microbiol* 18:151–167.
- 623 22. Coffey MJ, Sleebs BE, Uboldi AD, Garnham A, Franco M, Marino ND, Panas MW,  
624 Ferguson DJ, Enciso M, O'Neill MT, Lopaticki S, Stewart RJ, Dewson G, Smyth GK,  
625 Smith BJ, Masters SL, Boothroyd JC, Boddey JA, Tonkin CJ. 2015. An aspartyl protease  
626 defines a novel pathway for export of *Toxoplasma* proteins into the host cell. *eLife* 4.
- 627 23. Meissner M, Brecht S. 2001. Modulation of myosin A expression by a newly established  
628 tetracycline repressor-based inducible system in *Toxoplasma gondii*. *Nucleic acids*  
629 *research* 29:E115–E115.
- 630 24. Sheiner L, Demerly JL, Poulsen N, Beatty WL, Lucas O, Behnke MS, White MW, Striepen  
631 B. 2011. A systematic screen to discover and analyze apicoplast proteins identifies a  
632 conserved and essential protein import factor. *PLoS Pathog* 7:e1002392. doi:  
633 10.1371/journal.ppat.1002392. Epub-e1002392. doi: 10.1371/journal.ppat.1002392. Epub.
- 634 25. Teo G, Liu G, Zhang J, Nesvizhskii AI, Gingras A-C, Choi H. 2014. SAINTexpress:  
635 improvements and additional features in Significance Analysis of INTeractome software. *J*  
636 *Proteomics* 100:37–43.
- 637 26. Franco M, Panas MW, Marino ND, Lee M-CW, Buchholz KR, Kelly FD, Bednarski JJ,  
638 Sleckman BP, Pourmand N, Boothroyd JC. 2016. A Novel Secreted Protein, MYR1, Is  
639 Central to *Toxoplasma's* Manipulation of Host Cells. *mBio* 7:e02231-15.



- 640 27. Marino ND, Panas MW, Franco M, Theisen TC, Naor A, Rastogi S, Buchholz KR, Lorenzi  
641 HA, Boothroyd JC. 2018. Identification of a novel protein complex essential for effector  
642 translocation across the parasitophorous vacuole membrane of *Toxoplasma gondii*. PLOS  
643 Pathogens 14:e1006828.
- 644 28. Reese ML, Shah N, Boothroyd JC. 2014. The *Toxoplasma* pseudokinase ROP5 is an  
645 allosteric inhibitor of the immunity-related GTPases. The Journal of biological chemistry  
646 289:27849–58.
- 647 29. Delorme-Walker V, Abrivard M, Lagal V, Anderson K, Perazzi A, Gonzalez V, Page C,  
648 Chauvet J, Ochoa W, Volkmann N, Hanein D, Tardieux I. 2012. Toxofilin upregulates the  
649 host cortical actin cytoskeleton dynamics, facilitating *Toxoplasma* invasion. J Cell Sci  
650 125:4333–4342.
- 651 30. Guo H, Gao Y, Jia H, Moumouni PFA, Masatani T, Liu M, Lee S-H, Galon EM, Li J, Li Y,  
652 Tumwebaze MA, Benedicto B, Xuan X. 2019. Characterization of strain-specific  
653 phenotypes associated with knockout of dense granule protein 9 in *Toxoplasma gondii*.  
654 Molecular and Biochemical Parasitology 229:53–61.
- 655 31. Bougdour A, Durandau E, Brenier-Pinchart M-P, Ortet P, Barakat M, Kieffer S, Curt-  
656 Varesano A, Curt-Bertini R-L, Bastien O, Coute Y, Pelloux H, Hakimi M-A. 2013. Host Cell  
657 Subversion by *Toxoplasma* GRA16, an Exported Dense Granule Protein that Targets the  
658 Host Cell Nucleus and Alters Gene Expression. Cell Host & Microbe 13:489–500.

- 659 32. Shastri AJ, Marino ND, Franco M, Lodoen MB, Boothroyd JC. 2014. GRA25 is a novel  
660 virulence factor of *Toxoplasma gondii* and influences the host immune response. *Infection*  
661 and immunity 82:2595–605.
- 662 33. Pernas L, Adomako-Ankomah Y, Shastri AJ, Ewald SE, Treeck M, Boyle JP, Boothroyd  
663 JC. 2014. *Toxoplasma* effector MAF1 mediates recruitment of host mitochondria and  
664 impacts the host response. *PLoS biology* 12:e1001845.
- 665 34. Bull H, Murray PG, Thomas D, Fraser AM, Nelson PN. 2002. Acid phosphatases. *Mol*  
666 *Pathol* 55:65–72.
- 667 35. Meng TC, Lin MF. 1998. Tyrosine phosphorylation of c-ErbB-2 is regulated by the cellular  
668 form of prostatic acid phosphatase in human prostate cancer cells. *J Biol Chem*  
669 273:22096–22104.
- 670 36. Clark SA, Ambrose WW, Anderson TR, Terrell RS, Toverud SU. 1989. Ultrastructural  
671 localization of tartrate-resistant, purple acid phosphatase in rat osteoclasts by  
672 histochemistry and immunocytochemistry. *J Bone Miner Res* 4:399–405.
- 673 37. Bozzo GG, Raghothama KG, Plaxton WC. 2002. Purification and characterization of two  
674 secreted purple acid phosphatase isozymes from phosphate-starved tomato  
675 (*Lycopersicon esculentum*) cell cultures. *Eur J Biochem* 269:6278–6286.
- 676 38. Kaida R, Serada S, Norioka N, Norioka S, Neumetzler L, Pauly M, Sampedro J, Zarra I,  
677 Hayashi T, Kaneko TS. 2010. Potential role for purple acid phosphatase in the  
678 dephosphorylation of wall proteins in tobacco cells. *Plant Physiol* 153:603–610.

- 679 39. Treeck M, Sanders JL, Elias JE, Boothroyd JC. 2011. The phosphoproteomes of  
680 *Plasmodium falciparum* and *Toxoplasma gondii* reveal unusual adaptations within and  
681 beyond the parasites' boundaries. *Cell host & microbe* 10:410–9.
- 682 40. Panas MW, Ferrel A, Naor A, Tenborg E, Lorenzi HA, Boothroyd JC. 2019. Translocation  
683 of Dense Granule Effectors across the Parasitophorous Vacuole Membrane in  
684 *Toxoplasma*-Infected Cells Requires the Activity of ROP17, a Rhopty Protein Kinase.  
685 *mSphere* 4.
- 686 41. Donald RG, Carter D, Ullman B, Roos DS. 1996. Insertional tagging, cloning, and  
687 expression of the *Toxoplasma gondii* hypoxanthine-xanthine-guanine  
688 phosphoribosyltransferase gene. Use as a selectable marker for stable transformation.  
689 *The Journal of biological chemistry* 271:14010–9.
- 690 42. Fox B, Ristuccia J, Gigley J, Bzik D. 2009. Efficient gene replacements in *Toxoplasma*  
691 *gondii* strains deficient for nonhomologous end joining. *Eukaryotic cell* 8:520–529.
- 692 43. Huynh M, Carruthers V. 2009. Tagging of endogenous genes in a *Toxoplasma gondii*  
693 strain lacking Ku80. *Eukaryotic cell* 8:530–539.
- 694 44. Donald RG, Roos DS. 1993. Stable molecular transformation of *Toxoplasma gondii*: a  
695 selectable dihydrofolate reductase-thymidylate synthase marker based on drug-resistance  
696 mutations in malaria. *Proceedings of the National Academy of Sciences of the United*  
697 *States of America* 90:11703–7.

- 698 45. Saeij JPJ, Arrizabalaga G, Boothroyd JC. 2008. A cluster of four surface antigen genes  
699 specifically expressed in bradyzoites, SAG2CDXY, plays an important role in *Toxoplasma*  
700 *gondii* persistence. *Infection and immunity* 76:2402–10.
- 701 46. Salamun J, Kallio JP, Daher W, Soldati-Favre D, Kursula I. 2014. Structure of *Toxoplasma*  
702 *gondii* coronin, an actin-binding protein that relocalizes to the posterior pole of invasive  
703 parasites and contributes to invasion and egress. *The FASEB Journal*.
- 704 47. Shen B, Brown KM, Lee TD, Sibley LD. 2014. Efficient Gene Disruption in Diverse Strains  
705 of *Toxoplasma gondii* Using CRISPR/CAS9. *mBio* 5.
- 706 48. Kim K, Soldati D, Boothroyd J. 1993. Gene replacement in *Toxoplasma gondii* with  
707 chloramphenicol acetyltransferase as selectable marker. *Science* 262:911–914.
- 708 49. Hortua Triana MA, Márquez-Nogueras KM, Chang L, Stasic AJ, Li C, Spiegel KA, Sharma  
709 A, Li Z-H, Moreno SNJ. 2018. Tagging of Weakly Expressed *Toxoplasma gondii* Calcium-  
710 Related Genes with High-Affinity Tags. *J Eukaryot Microbiol* 65:709–721.
- 711 50. Yang C, Broncel M, Dominicus C, Sampson E, Blakely WJ, Treeck M, Arrizabalaga G.  
712 2019. A plasma membrane localized protein phosphatase in *Toxoplasma gondii*, PPM5C,  
713 regulates attachment to host cells. *Sci Rep* 9:5924.

715 **FIGURE LEGENDS**

716 **Figure 1. TGGT1\_228170 is processed and secreted into the parasitophorous vacuole.**

717 To determine the localization of TGGT1\_228170 we introduced a C-terminal HA epitope tag in  
718 the endogenous gene. A) Schematic showing relative position of the signal peptide (SP), the  
719 phosphatase domain (Metallophos), and the two putative TEXEL cleavage sites, 1205-1209  
720 and 1348-1352. The C terminal HA epitope tag is also shown. Below the schematic are the  
721 sequences of the TEXEL1 and TEXEL2 cleavage domains compared to the consensus of the  
722 *Plasmodium* PEXEL domain. B) Western blot of protein lysates from intracellular and  
723 extracellular parasite of the TGGT1\_228170(HA) expressing strain probed with antibodies  
724 against HA. Two stable forms, labeled as long and short, are detected. C) Heat map illustrating  
725 relative position of peptide to spectrum matches (PSMs) from mass spectrometric analysis of  
726 long and short forms of TGGT1\_228170(HA) in respect to the full protein and the putative  
727 cleavage sites. D) Immunofluorescence assay (IFA) of intracellular parasites of the IFA images  
728 of strain expressing TGGT1\_228170(HA) stained for the parasitophorous vacuole protein Gra7  
729 (in red) and for HA (in green). Scale bar = 2  $\mu$ m.

730 **Figure 2. The second putative TEXEL motif is critical for efficient processing of GRA44.**

731 To determine the site responsible for the processing of GRA44 we expressed exogenous  
732 copies of GRA44(HA) in which the first arginine of the putative cleavage sites were mutated to  
733 alanine individually (R1205A and R1348A) or in combination (R1205A/R1348A) or in which the  
734 five amino acids of the second putative site were deleted ( $\Delta$ 1348-1352). A) Diagram of the  
735 PEXEL consensus and the putative sites in GRA44 with the mutated amino acids indicated in  
736 red. B) Western blot of lysates from parasites expressing the exogenous GRA44(HA) or  
737 mutant versions R1205A, R1348A and the double mutant R1205A/R1348A probed for HA. C)

738 Western blot of lysates from parasites expressing an exogenous copy of GRA44 lacking the  
739 second site ( $\Delta$ 1348-1352) probed with antibodies against the HA epitope tag. Graph  
740 represents the percent cleavage in each strain, which was determined by calculating the ratio  
741 of the density of the large band over the sum of the density of both bands.  $n=3$ ,  $\pm$ SD,  $*p<0.05$   
742 paired t test. D) Representative IFA images of intracellular parasites expressing each of the  
743 four GRA44 mutant TEXELs. Scale bars = 2  $\mu$ m.

744 **Figure 3. The GRA44 N-terminal cleavage product is secreted.** To determine the stability  
745 and localization of the GRA44 N-terminal cleavage product we expressed an exogenous copy  
746 of GRA44 with an internal MYC epitope tag and a C-terminal HA epitope tag. A) Schematic of  
747 exogenous Gra44 construct myc-TXL-HA showing the position of the MYC and HA epitope  
748 tags relative to the two putative cleavage sites. B) Western blot of myc-TXL-HA parasite line  
749 separately probed anti-HA and anti-myc antibodies. C) IFA images of myc-TXL-HA expressing  
750 parasites probed for HA (red) and MYC (green). Scale bar = 2  $\mu$ m.

751 **Figure 4. Knockdown of GRA44 disrupts parasite propagation.** To determine the function  
752 of GRA44 we applied a tetracycline (tet) repressible system to establish a conditional GRA44  
753 knockdown strain. A) Diagram of strategy used to generate conditional knockdown of GRA44,  
754 as outlined in methods section. B) Quantitative western blot of TATi-GRA44(HA) parasite  
755 strain grown for either 24 or 48 hours in absence (-) or presence (+) of ATc probed with HA to  
756 detect GRA44 and for SAG1 as a loading control. C) Reduction in GRA44 expression in  
757 presence of ATc was confirmed with IFA of intracellular parasites of the TATi-GRA44(HA)  
758 strain grown with and without ATc for 24 or 48 hours and probed with anti-HA antibodies.  
759 Scale bars = 2  $\mu$ m. D) Plaque assays were performed with the GRA44(HA) parasites  
760 (parental) or the TATi-GRA44(HA) parasites grown without (-) or with (+) ATc for 5 days.

761 Representative plaque assay is shown on the left. Results were quantitated based on percent  
762 cell monolayer cleared by parasite (cleared area) and the average biological and experimental  
763 triplicates are shown in graph (n=3,  $\pm$ SD,  $p < 0.0001$  unpaired t test).

764 **Figure 5. Phenotype of GRA44 knockdown can be complemented.** To establish a direct  
765 connection between the lack of GRA44 and the phenotype observed, we established a  
766 complemented strain by adding an exogenous copy of wild type GRA44 to the TATi-  
767 GRA44(HA) conditional knockdown strain. A) Diagram of strategy used to establish a  
768 complemented strain TATi-GRA44(HA)comp. The wild type copy of GRA44 added to the TATi-  
769 GRA44(HA) strain contains a C-terminal MYC epitope tag and is driven by the *Toxoplasma*  
770 tubulin promoter (tub). B) Western blot of lysates from the TATi-GRA44(HA)comp parasites  
771 grown with and without ATc for 48 hours. Blots were probed for HA and MYC (C)  
772 Representative IFA images of TATi-GRA44(HA)comp with and without ATc treatment. In green  
773 is the HA tagged regulatable GRA44 and in red is the myc tagged constitutive exogenous  
774 copy. Scale bars = 2  $\mu$ m. D) Plaque assays were performed with the knockdown (TATi-  
775 GRA44(HA)) and the complemented (TATi-GRA44(HA)comp) strains grown without (-) or with  
776 (+) ATc for 5 days. Average of biological and experimental triplicates is shown in bar graph  
777 based on percent of cell monolayer cleared (n = 3,  $\pm$ SD, \*\*\*\* $p < 0.0001$  One-way ANOVA  
778 followed by Tukey). E) TATi-GRA44(HA) was complemented with an exogenous copy of  
779 GRA44 containing TEXEL deletion 1348-1352 and C-terminal MYC tag (TATi-  
780 GRA44(HA)comp $\Delta$ TXL). Lysates from TATi-GRA44(HA), WT complemented strain TATi-  
781 GRA44(HA)comp and  $\Delta$ TXL complemented strain TATi-GRA44(HA)comp $\Delta$ TXL were analyzed  
782 by Western blot and probed for HA and MYC. F) Plaque assays were performed with TATi-  
783 GRA44(HA) and TATi-GRA44(HA)comp $\Delta$ TXL strains. Parasites were grown 5 days without (-)

784 or with (+) ATc. Average percent cell monolayer cleared for biological and experimental  
785 triplicates is shown by bar graph (n = 3  $\pm$ SD, \*\*\*\* p<0.0001 One-way ANOVA followed by  
786 Tukey).

787 **Figure 6. GRA44 interacts with MYR1.** To confirm the interaction between GRA44 and  
788 MYR1, we performed immunoprecipitation from GRA44(HA) expressing parasites and probed  
789 for GRA44(HA) (A) or either the N-terminus (B) or the C-terminus (C) of MYR1 by Western  
790 blot. As controls we performed the immunoprecipitation was performed with IgG conjugated  
791 beads. In all blots the first lane is whole lysate (WL), middle lane is eluate from IgG beads, and  
792 last lane is eluate from the HA beads.

793 **Figure 7. cMYC activation in GRA44 mutant strain.** To assess host cell response upon  
794 GRA44 knockdown, host nuclear cMYC expression was quantified by fluorescence microscopy  
795 after invasion by either knockdown TATI-GRA44(HA) or complemented knockdown TATI-  
796 GRA44(HA)comp parasite strains in presence and absence of ATc. A. Representative  
797 immunofluorescence images of TATI-GRA44(HA) parasites grown without (-) or with (+) ATc  
798 Cultures were stained for host cMYC (red), DAPI to detect DNA and nuclei (blue), and HA to  
799 detect GRA44 (green). Arrows point at vacuoles with more than 2 parasites. B. Graph  
800 represents average quantified nuclear signal from cMYC antibody staining across biological  
801 and experimental triplicates. Arbitrary unites (AU) were used in comparing nuclear cMYC  
802 signal intensity. (n= 3, \*\*\*\*p<0.0001 One-way ANOVA followed by Tukey).

803



804

805

| ID number    | Product description                                      |
|--------------|----------------------------------------------------------|
| TGGT1_316250 | GRA45                                                    |
| TGGT1_204340 | GRA54                                                    |
| TGGT1_254470 | MYR1                                                     |
| TGGT1_319340 | GRA52                                                    |
| TGGT1_279100 | MAF1a                                                    |
| TGGT1_251540 | GRA9                                                     |
| TGGT1_203600 | GRA50                                                    |
| TGGT1_304955 | serine/threonine specific protein phosphatase (PPM11C)   |
| TGGT1_315610 | hypothetical protein                                     |
| TGGT1_203290 | GRA34                                                    |
| TGGT1_270320 | protein phosphatase 2C domain-containing protein (PPM3C) |
| TGGT1_258870 | hypothetical protein                                     |
| TGGT1_311720 | chaperonin protein BiP                                   |
| TGGT1_226240 | putative bud site selection protein                      |
| TGGT1_216770 | hypothetical protein                                     |
| TGGT1_220950 | MAF1b                                                    |
| TGGT1_270240 | MAG1                                                     |
| TGGT1_200360 | hypothetical protein                                     |
| TGGT1_290700 | Gra25                                                    |
| TGGT1_258458 | hypothetical protein                                     |
| TGGT1_262050 | rhoptry kinase family protein ROP39                      |
| TGGT1_410360 | MAF1 copy                                                |
| TGGT1_247440 | GRA33                                                    |
| TGGT1_229480 | putative calcium binding protein precursor               |
| TGGT1_208830 | GRA16                                                    |
| TGGT1_410370 | MAF1 copy                                                |

806 Table 1. Putative GRA44 interactors identified by IP. Criteria used were Saint Score (SP) of  
807 >0.8, and not ribosomal protein (TGGT1\_309820, TGGT1\_207840, TGGT1\_266070,  
808 TGGT1\_248480). Highlighted proteins have a predicted signal peptide based on SignalP  
809 analysis. Proteins are listed based on SAINT score, total peptides and fold change over  
810 controls (table S2).

A.

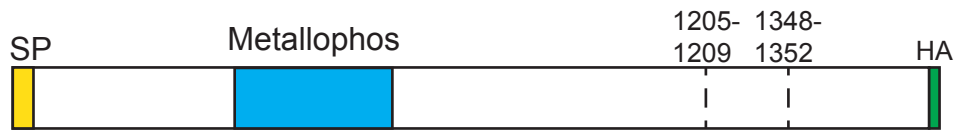

|                  |          |          |          |          |            |
|------------------|----------|----------|----------|----------|------------|
| TEXEL consensus  | <b>R</b> | <b>x</b> | <b>L</b> | <b>x</b> | <b>EDQ</b> |
| 228170 1205-1209 | <b>R</b> | <b>E</b> | <b>L</b> | <b>E</b> | <b>E</b>   |
| 228170 1348-1352 | <b>R</b> | <b>R</b> | <b>L</b> | <b>L</b> | <b>E</b>   |

B.

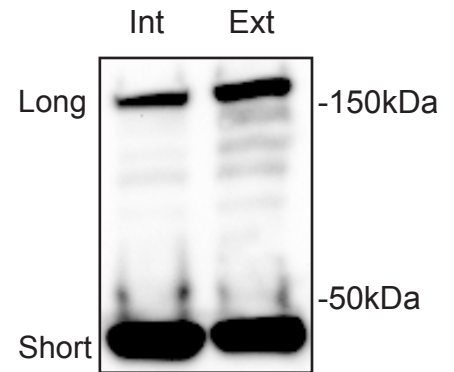

C.

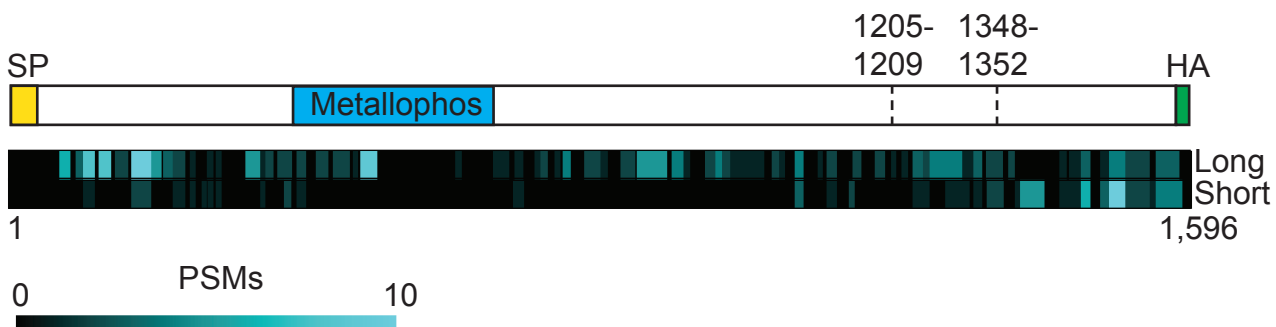

D.

TGGT1\_228170 HA

GRA7

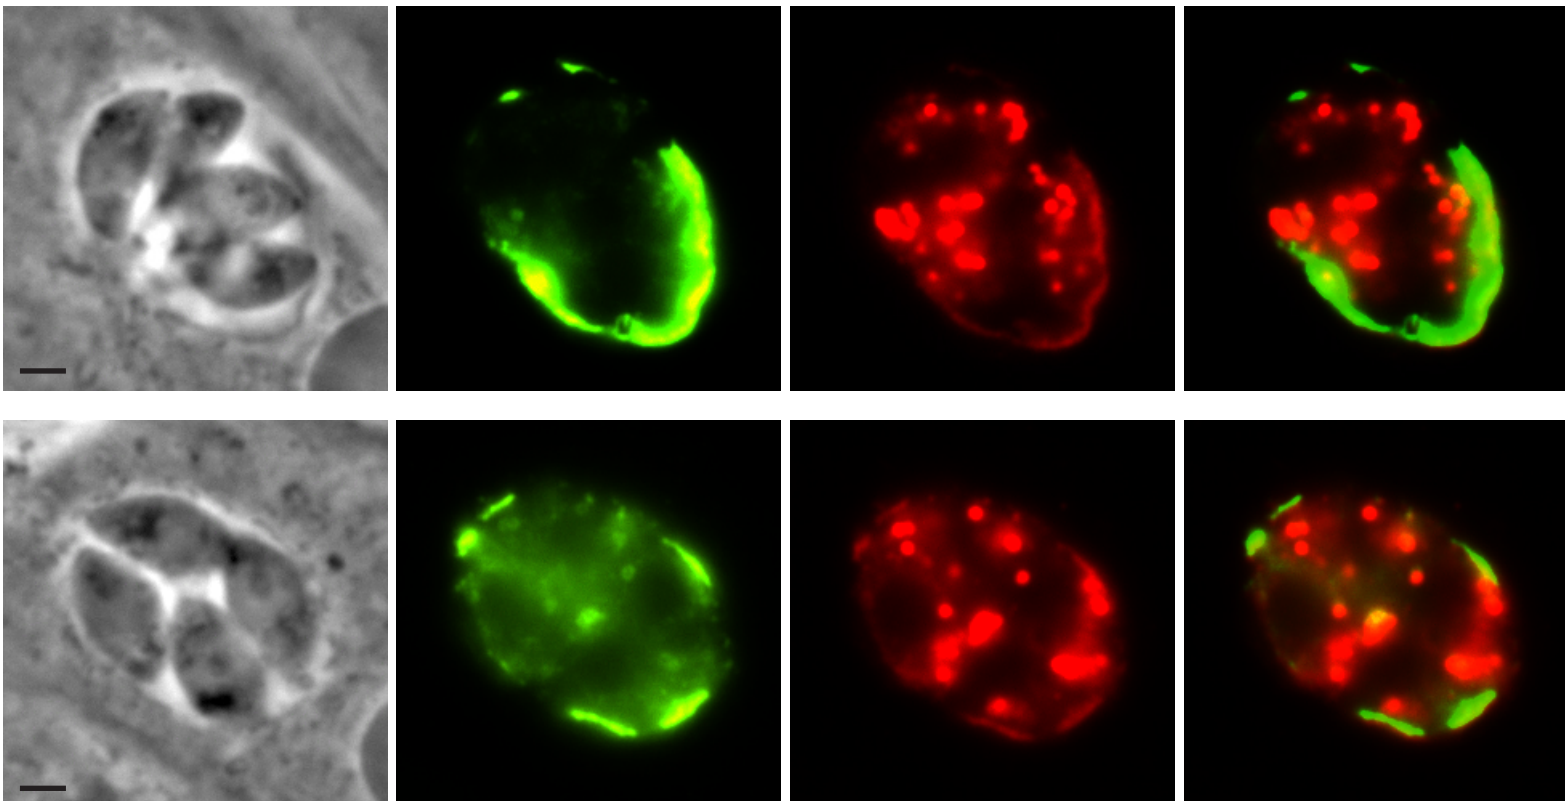

A.

|                 |   |   |   |   |     |
|-----------------|---|---|---|---|-----|
| PEXEL consensus | R | X | L | X | EDQ |
| GRA44 1205-1209 | R | E | L | E | E   |
| GRA44 R1205A    | A | E | L | E | E   |
| GRA44 1348-1352 | R | R | L | L | E   |
| GRA44 R1348A    | A | R | L | L | E   |

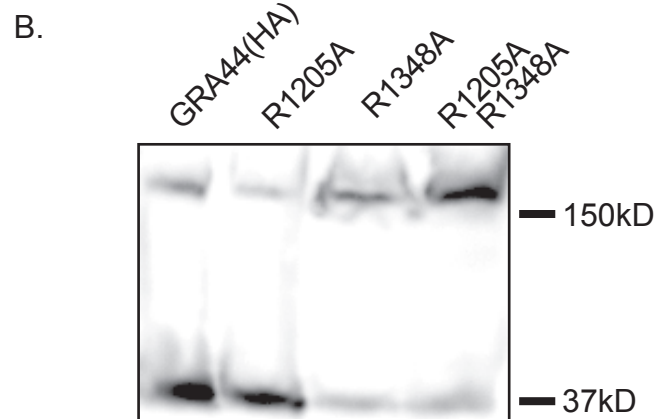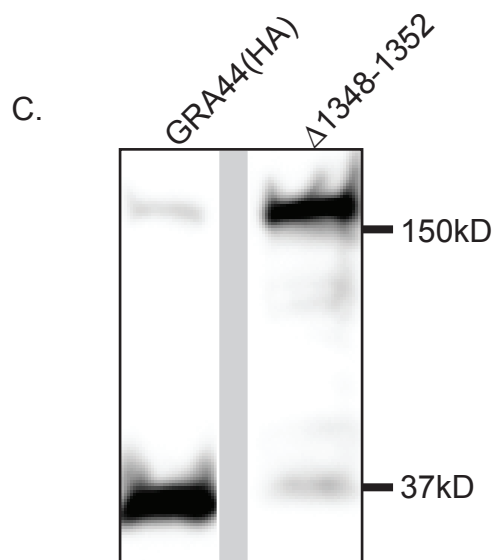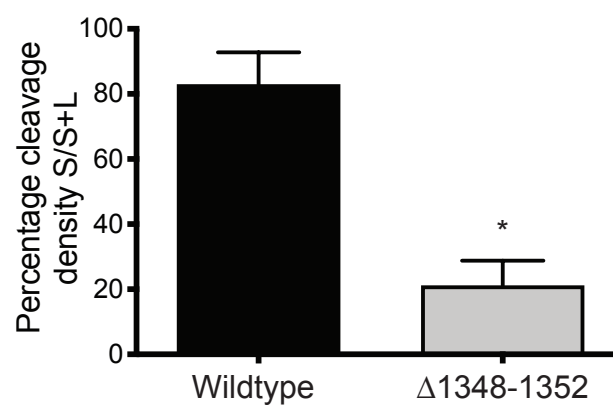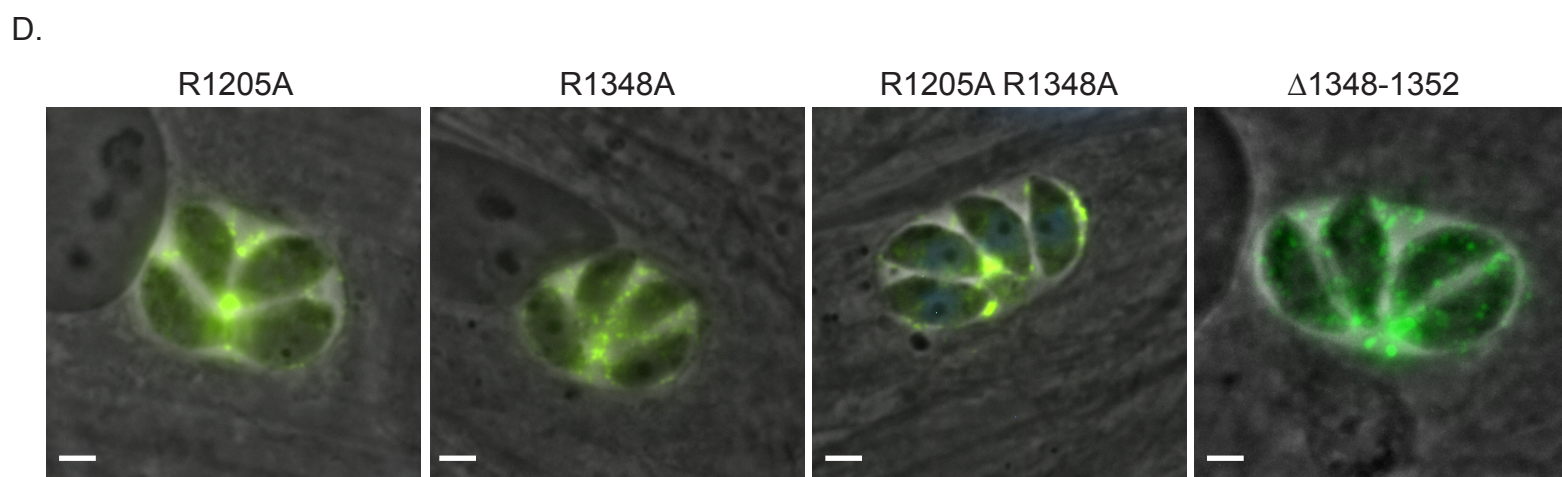

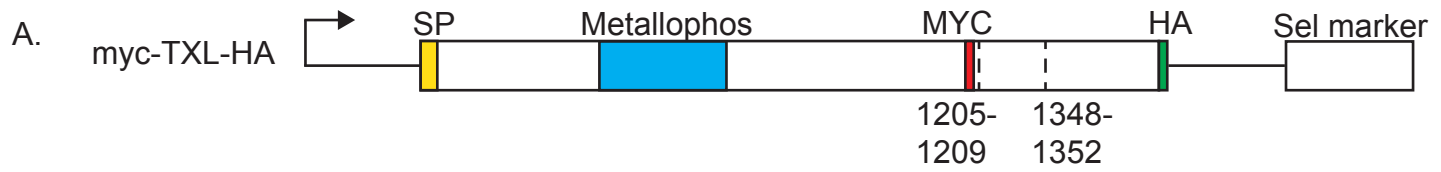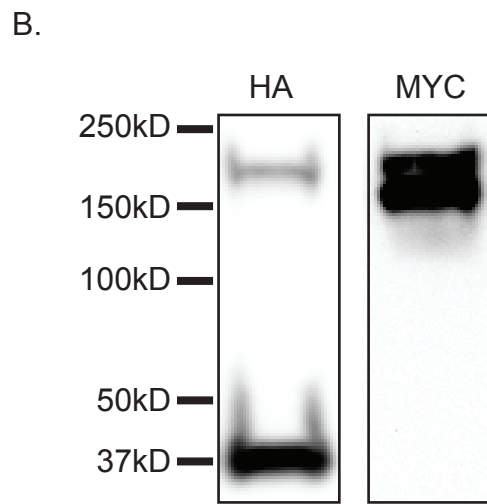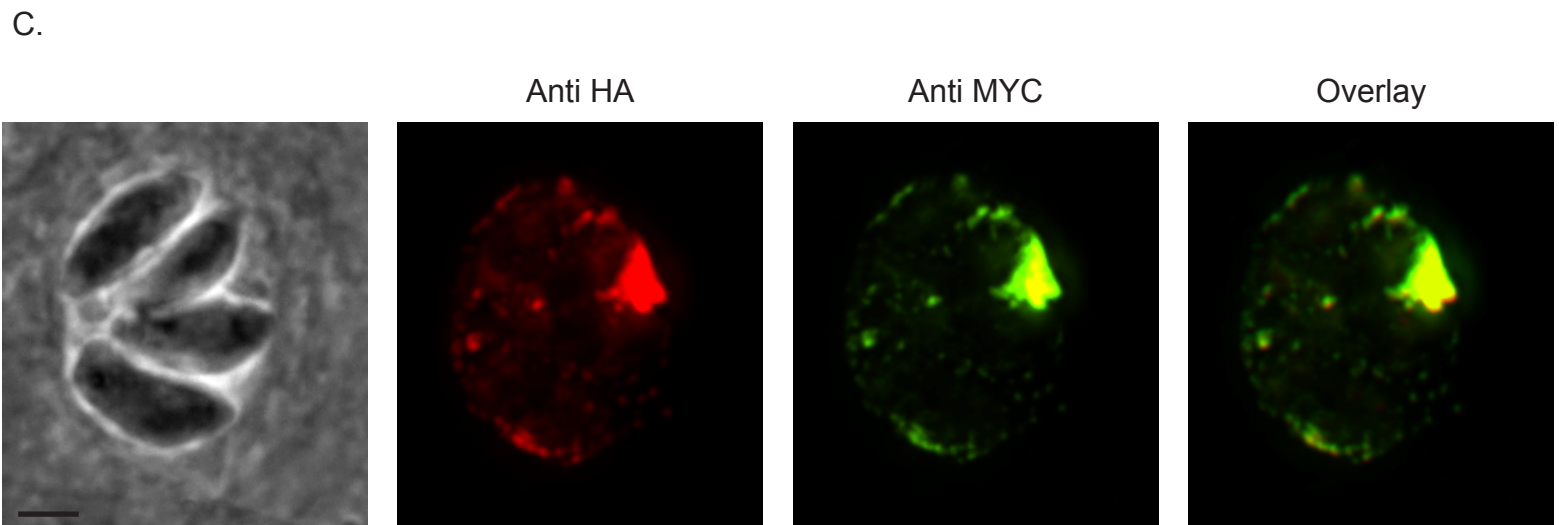

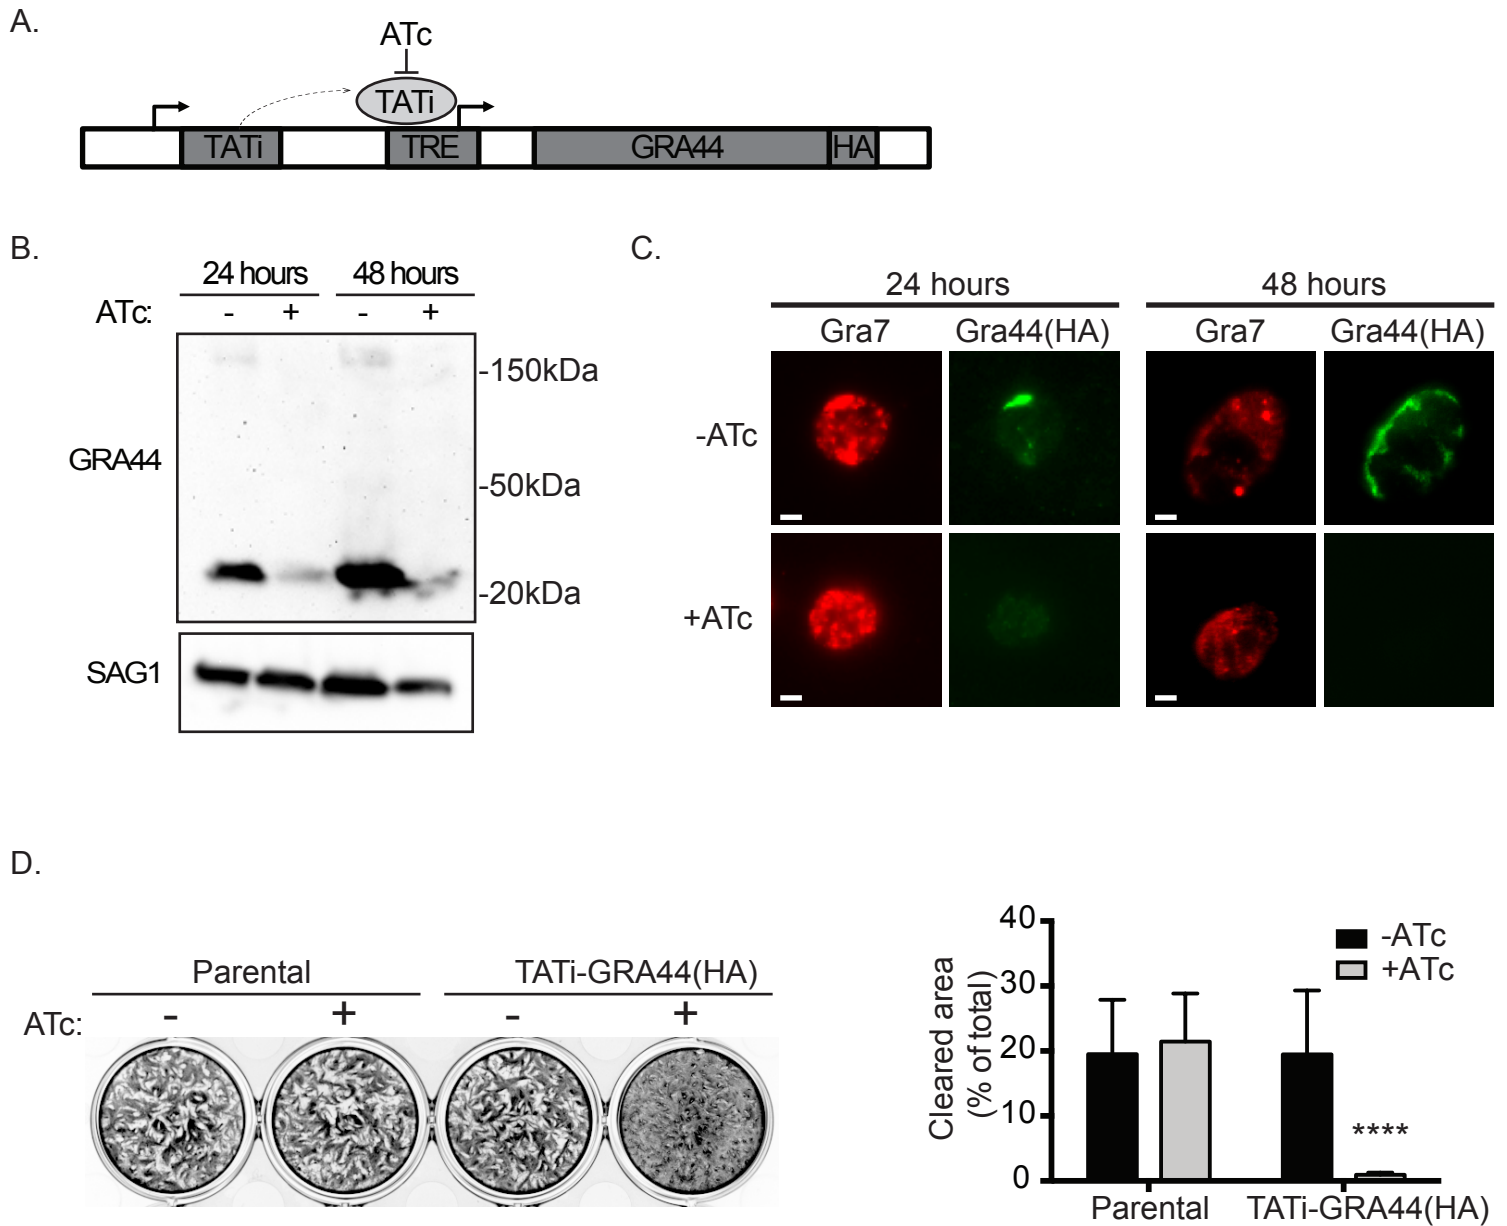

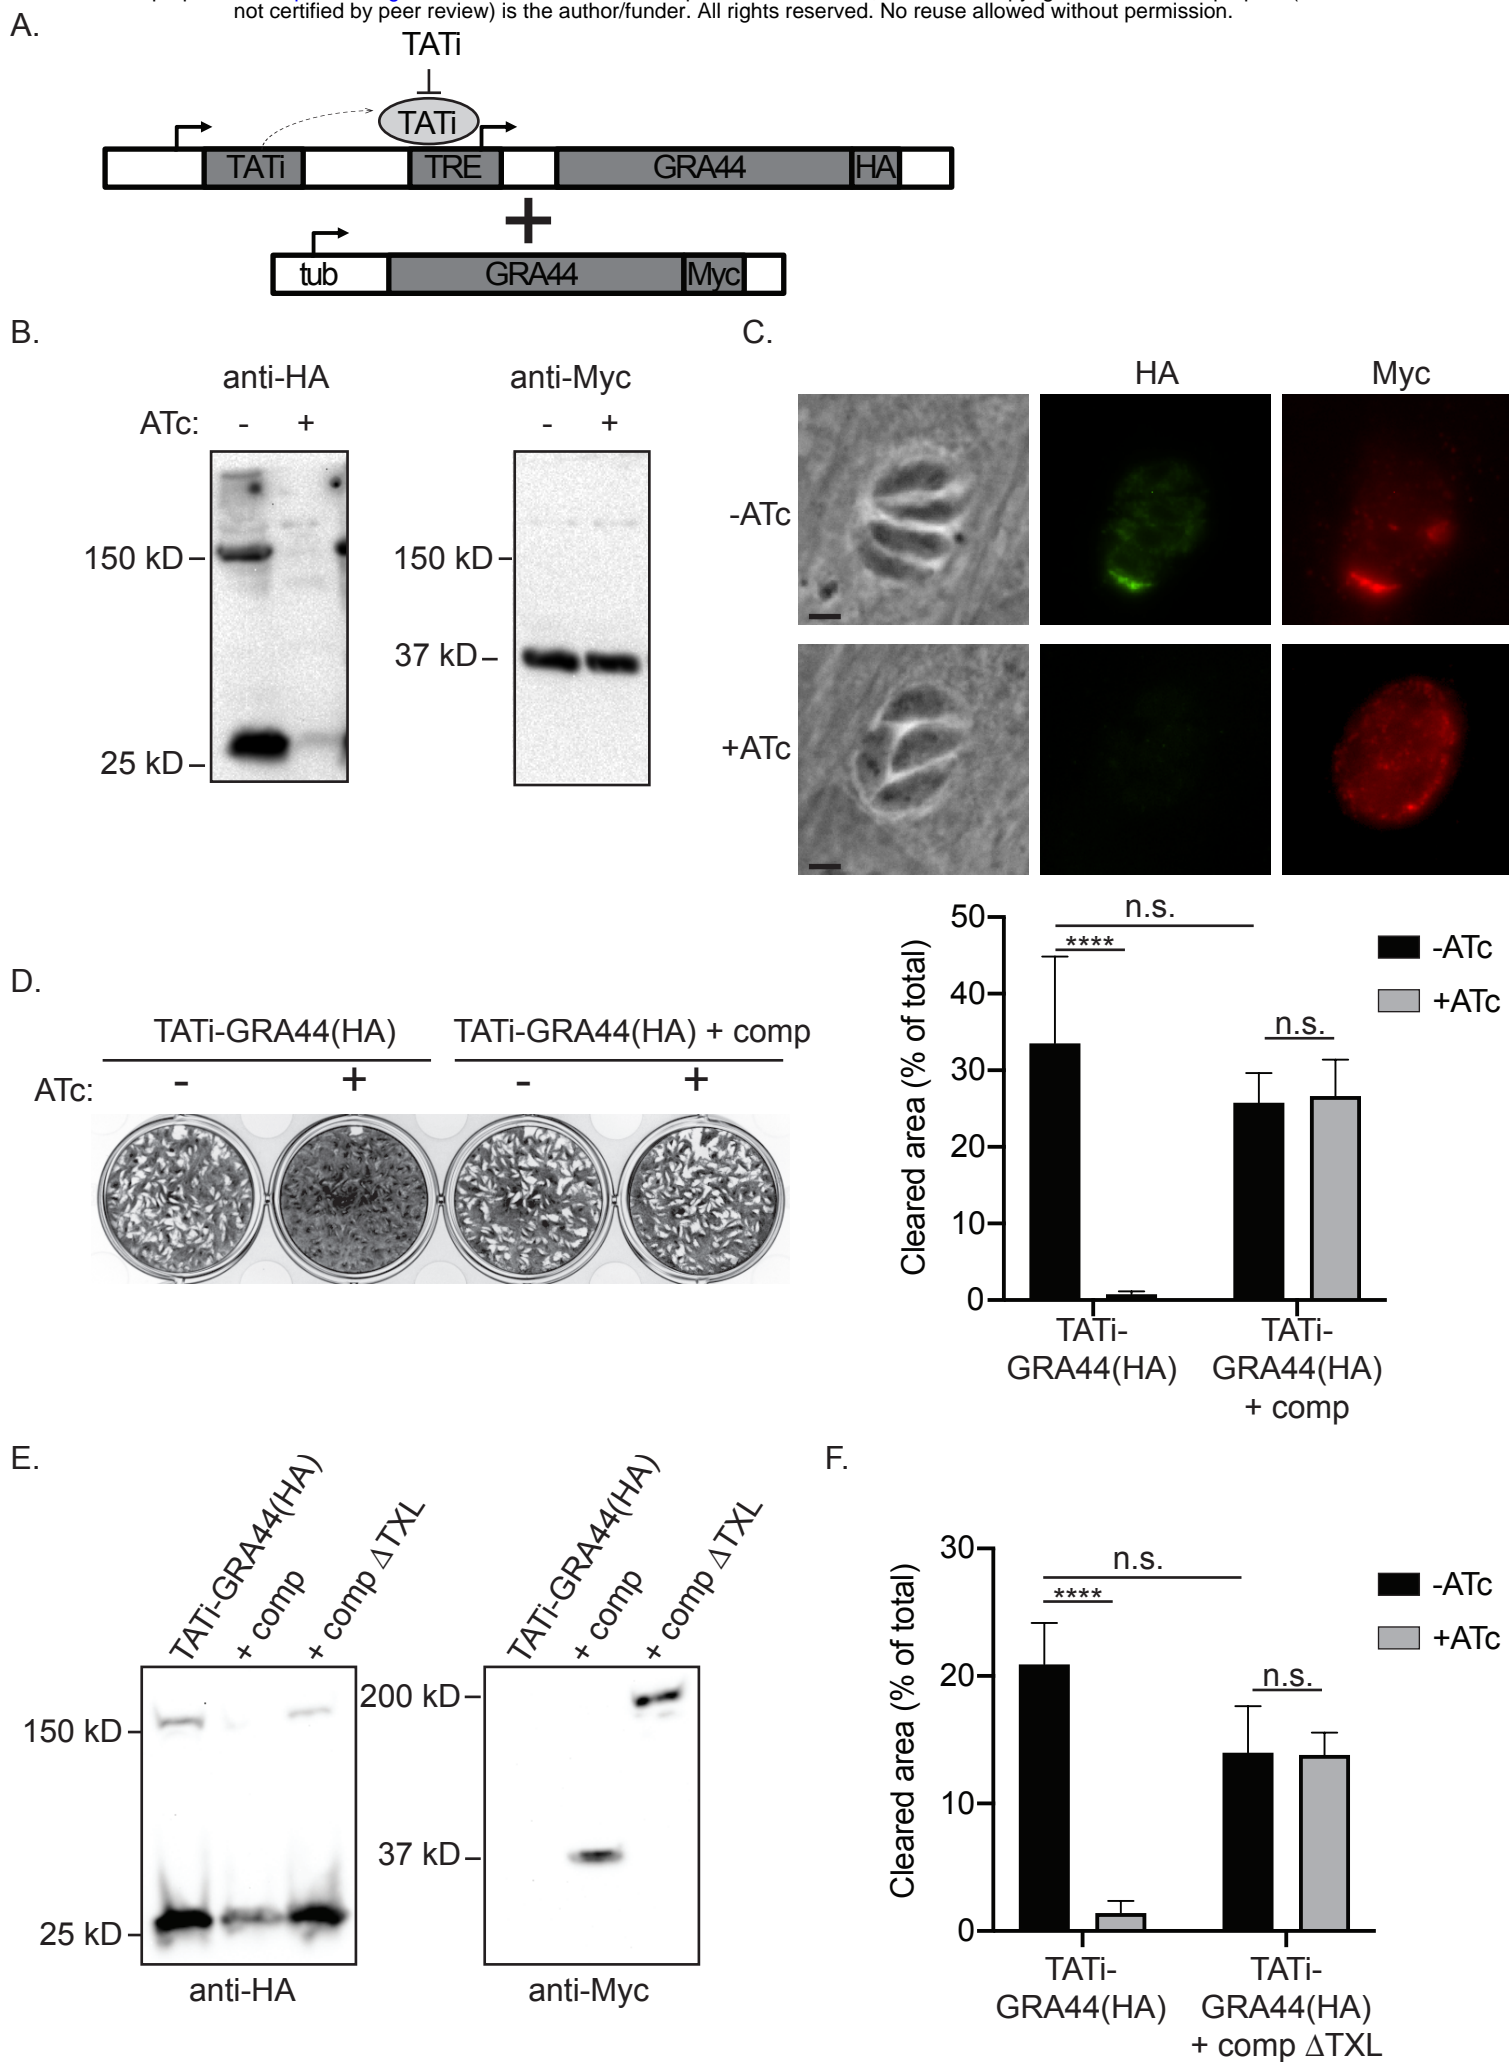

A.

IP: HA  
Probed: HA  
Elution  
IgG HA

WL

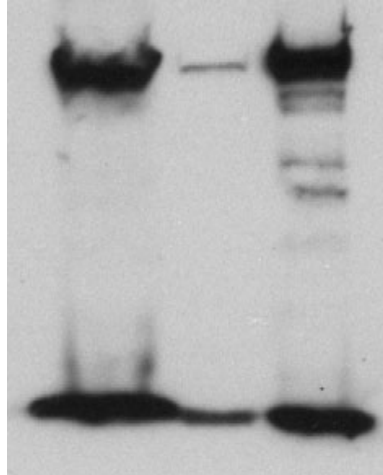

B.

IP: HA  
Probed: Myr1-N term  
Elution  
IgG HA

WL

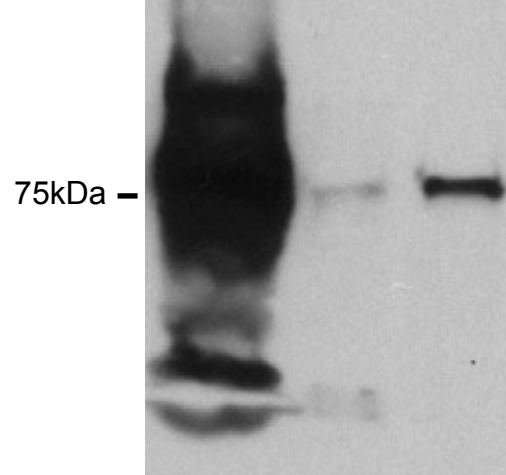

C.

IP: HA  
Probed: Myr1-C term  
Elution  
IgG HA

WL

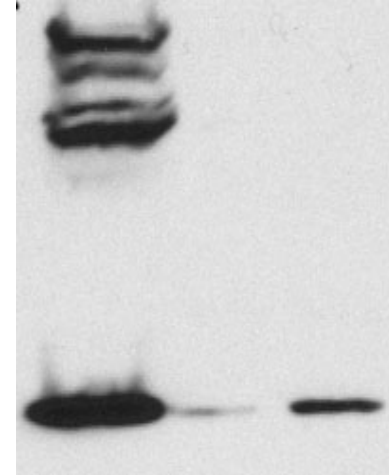

A.

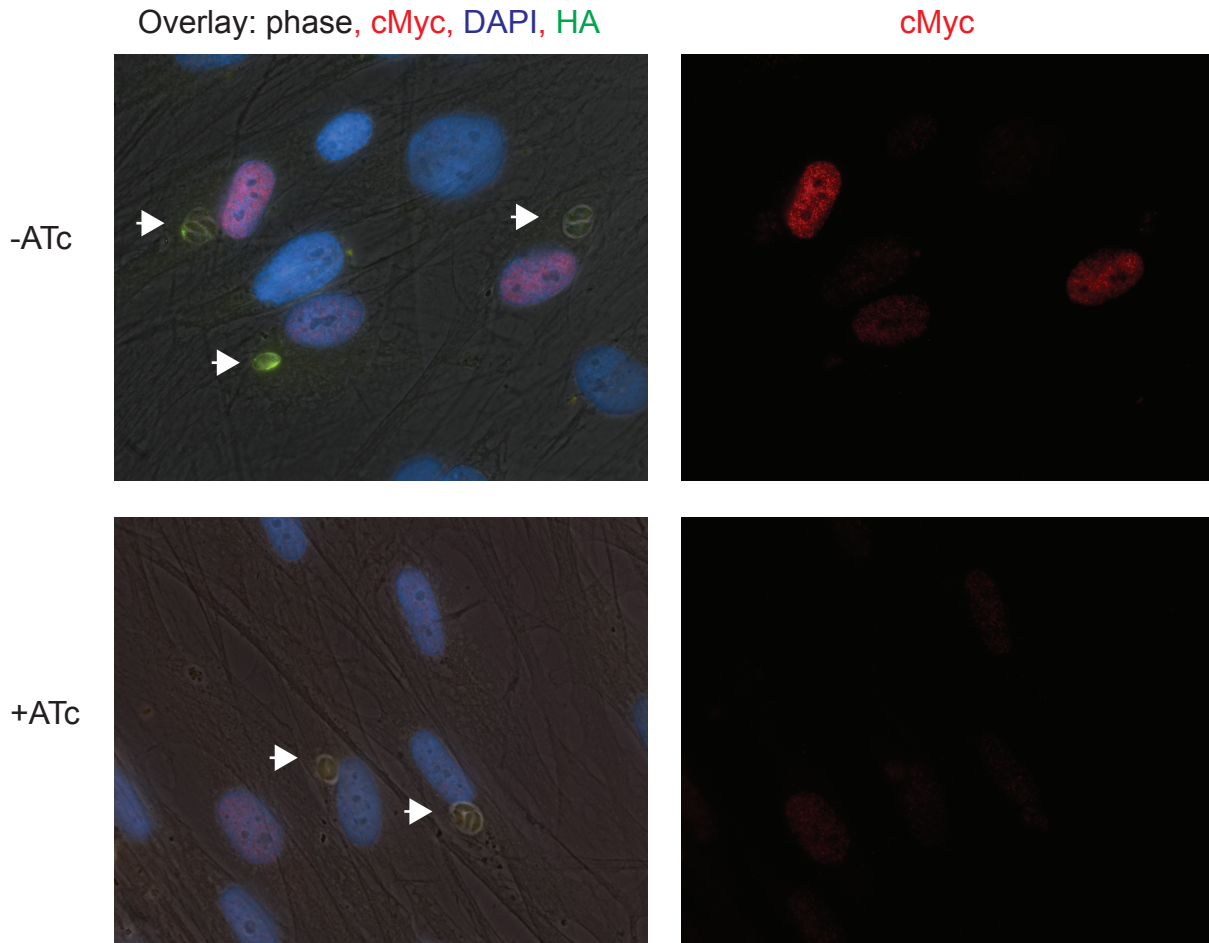

B.

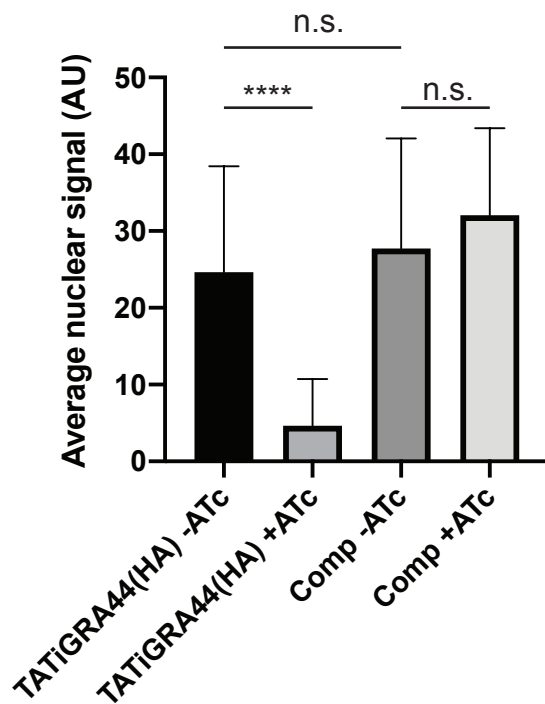

Source: http://biorxiv.org/content/10.1101/867614v1.full.pdf
